# Supplementary material for: Development of a novel prediction model based on protein structure for identifying RPE65-associated inherited retinal disease (IRDs) of missense variants
Source: PeerJ journal article supplement (doi:10.7717/peerj.15702), 2023-08-02
Supplement: code.zip [file code.zip]

## Sheet: Sheet1
Normal	P
-2	-2
-1	-3
1	-3
1	-3
-1	-3
1	-3
0	-1
-1	0
-2	1
-2	-3
-2	-2
0	-2
-3	0
0	-3
0	-2
-1	2
0	-2
0	2
-1	-2
1	-1
-2	2
3	-3
-2	2
-2	0
1	-3
-1	1
-2	-2
2	-3
-1	2
1	3
0	-1
-2	1
-2	-2
-1	-1
3	0
-2	-3
3	-2
1	1
1	-1
-3	-1
-2	2
0	-1
0	0
1	-2
3	-1
0	-3
-2	2
2	-2
-1	-1
-1	2
0	0
1	0
3	-1
1	-3
-3	-2
3	0
-1	-3
1	0
1	1
1	2
-1	-2
0	1
3	-1
1	-1
-1	3
3	-1
2	-1
1	-3
3	-1
-1	-3
3	-3
-2	-2
1	-1
-2	-1
0	-1
0	0
0	0
0	2
2	1
-2	0
-1	-2
-2	-2
1	2
-1	-2
0	-1
-2	-2
-2	-1
1	-2
0	2
1	-3
3	-3
2	-1
1	-1
3	-1
1	0
0	-3
-2	0
1	-3
1	-1
2	0
-2	2
2	-2
-3	-2
-1	-2
-1	-1
3	-2
1	2
0	-3
-1	0
-2	-1
-1	0
3	-3
-1	0
1	-2
0	0
-1	-3
-1	-2
-2	-1
-3	1
2	-1
0	-1
1	-3
2	-2
1	-3
-3	0
-1	-2
-1	-3
-3	0
1	1
0	-1
-3	-1
2	0
-3	-2
-3	0
2	0
-2	-1
-2	-1
1	-1
0	-2
2	-2
-1	-3
1	-3
-1	-1
2	-3
-1	1
1	1
-2	1
-2	-3
2	-2
2	-2
-1	-2
3	1
2	-1
0
2
-2
0
2
-1
-2
0
0
1
1
-1
0
3
1
-3
2
0
1
0
2
-2
-1
0
-3
1
-2
2
0
-2
1
-2
0
1
0
0
-1
0
-3
-1
-2
-1
2
2
1
2
0
-3
-1
0
-3
0
-2
-1
-1
1
1
-1
-1
1
-2
-1
0
1
3
2
-2
-3
1
-1
3
2
0
-1
-2
-1
-2
-2
-1
-2
2
0
-2
0
1
-1
-1
2
-3
0
-1
2
-1
2
2
0
1
2
-2
0
-2
1
1
2
0
2
2
-2
-1
3
1
0
2
-2
-1
-2
0
0
1
-3
3
-1
1
1
0
1
0
0
1
0
0
0
0
1
1
0
-1
0
1
-3
0
3
-1
-1
2
-2
-2
