# Supplementary material for: Development of a novel prediction model based on protein structure for identifying RPE65-associated inherited retinal disease (IRDs) of missense variants
Source: PeerJ. 2023 Aug 2;11:e15702. doi: 10.7717/peerj.15702 (PMC10404030; doi:10.7717/peerj.15702)
Supplement: Data S1 [file peerj-11-15702-s005.xlsx]

## Sheet: Sheet1
Patient	Gender	age	eye performance	Clinical Diagnosi	suspicious gene	AR/AD	transcription	Nucleotide change	amino acid changes	gene subregion	heterozygosity	chromosome location	ACMG category	Night blindness	illness onset	Family history	consanguineous marriage.	hearing loss	BCVA（OD）	BCVA（OS）	logMar（OD）	logMar（OD）	Fundus	ERG	Gene Diagnosis	AA change	Nucleotide change
1	Famale	10		RP?	RPE65	AR	NM_000329.2	c.1399C>G	p.Pro467Ala|p.P467A	EX13/CDS13	Het	chr1:68431116:G>C	VUS	Y	10	No	NO	No	0.9	0.9	0.0457575	0.0457575	WYD	undetectable dark-adapted; attenuated light-adapted	RP	p.Pro467Ala|p.P467A	c.1399C>G
					RPE65	AR	NM_000329.2	c.94+2T>A	_	Intron2	Het	chr1:68448622:A>T	LP													_	c.94+2T>A
2	Male	6		LCA	RPE65	AR	NM_000329	c.272G>A	p.R91Q	EX4	Het	chr1:68910540	P	Y	6	No	NO	No	0.25	0.12	0.60206	0.920819	WYD,PD	Extinct	LCA	p.R91Q	c.272G>A
				LCA	RPE65	AR	NM_000329	c.271C>T	p.R91W	EX4	Het	chr1:68910541	P													p.R91W	c.271C>T
3	Male	6		LCA	RPE65	AR	NM_000329	c.1399C>G	p.Pro467Ala|p.P467A		Het	chr1:68896799	VUS	/		No	NO	No	0.2	0.2	0.69897	0.69897	N	Extinct	LCA	p.Pro467Ala|p.P467A	c.1399C>G
					RPE65	AR	NM_000329	c.998+1G>A	-		Het	chr1:68904624	LP													-	c.998+1G>A
4	Male	15		RP?	RPE65	AR	NM_000329.2	c.493C>T(p.Gln165*/p.Q165*)	p.Gln165*|p.Q165*	EX5	Hom	chr1:68444533:G>A	P	Y	15	Y	Y	No	0.3	0.3	0.522879	0.522879	WYD,PD	Extinct	LCA	p.Gln165*|p.Q165*	c.493C>T(p.Gln165*/p.Q165*)
5	Female	8		LCA?	RPE65	AR	NM_000329.2	c.1338G>T	p.Arg446Ser|p.R446S	EX12	Hom	chr1:68431282:C>A	P	Y	8	No	NO	No					WYD	Profoundly attenuate	LCA	p.Arg446Ser|p.R446S	c.1338G>T
6	Male	9		RP?	RPE65	AR	NM_000329.2	c.1543C>T	p.Arg515Trp|p.R515W	EX14	Het	chr1:68429835:G>A	P	Y	5	Y	NO	No	0.25	0.15	0.60206	0.823909	N	Profoundly attenuate	RP	p.Arg515Trp|p.R515W	c.1543C>T
					RPE65	AR	NM_000329.2	c.1444G>A	p.Asp482Asn|p.D482N	EX13	Het	chr1:68431071:C>T	LP													p.Asp482Asn|p.D482N	c.1444G>A
7	Male	28		RP	RPE65	AR	NM_000329.2	c.1338G>T	p.Arg446Ser|p.R446S	EX12	Het	chr1:68431282:C>A	P	Y	28	Y	NO	No	0.1	LP	1	3.204	PD	Extinct	RP	p.Arg446Ser|p.R446S	c.1338G>T
					RPE65	AR	NM_000329.2	c.354-2A>G	_	Intron5	Het	chr1:68444674:T>C	LP													_	c.354-2A>G
8	Female	6		RP?LCA?	RPE65	AR	NM_000329.2	c.1255C>T	p.Pro419Ser|p.P419S	EX12	Het	chr1:68431365:G>A	VUS	Y	6	No	NO	No	0.1	0.05	1	1.30103	WYD	Extinct	LCA	p.Pro419Ser|p.P419S	c.1255C>T
					RPE65	AR	NM_000329.2	c.202C>T	p.His68Tyr|p.H68Y	EX3	Het	chr1:68446753:G>A	P													p.His68Tyr|p.H68Y	c.202C>T
9	Male	10		RP?LCA?	RPE65	AR	NM_000329.2	c.1590C>A	p.Phe530Leu|p.F530L	EX14	Het	chr1:68429788:G>T	LP	Y	10	No	NO	No	0.3	0.4	0.522879	0.39794	WYD	Profoundly attenuate	LCA	p.Phe530Leu|p.F530L	c.1590C>A
					RPE65	AR	NM_000329.2	c.858+1delG	_	Intron9	Het	chr1:68439189:AC>A	LP													_	c.858+1delG
10	Female	48	Nystagmus	RP	RPE65	AR	NM_000329.2	c.997G>C	p.Gly333Arg|p.G333R	EX9	Hom	chr1:68438943:C>G	VUS	Y	48	No	NO	No	LP	LP	3.204	3.204	PD	Extinct	LCA	p.Gly333Arg|p.G333R	c.997G>C
					RPE65	AR	NM_000329.2	c.334T>A	p.Cys112Ser|p.C112S	EX4	Het	chr1:68444795:A>T	VUS													p.Cys112Ser|p.C112S	c.334T>A
11	Male	20	Nystagmus	RP	RPE65	AR	NM_000329.2	c.837del	p.Phe279Leufs46|p.F279Lfs46	EX8	Hom	chr1:68439211:CA>C	LP	Y	15	No	NO	No	0.15	0.1	0.823909	1	N	Profoundly attenuate	LCA	p.Phe279Leufs46|p.F279Lfs46	c.837del
	Male	30	Nystagmus	RP	RPE65	AR	NM_000329.2	c.376del(p.Val126*fs1/p.V126*fs1)	p.Val126*fs1|p.V126*fs1	EX5	Het	chr1:68444649:AC>A	LP	Y	30	No	NO	No	HM	FC	2.903	2.903		Extinct	LCA	p.Val126*fs1|p.V126*fs1	c.376del(p.Val126*fs1/p.V126*fs1)
12					RPE65	AR	NM_000329.2	c.271C>T	p.Arg91Trp|p.R91W	EX4	Het	chr1:68444858:G>A	P													p.Arg91Trp|p.R91W	c.271C>T
13	Female	30		RP	RPE65	AR	NM_000329.2	c.1444G>A	p.Asp482Asn|p.D482N	EX13	Het	chr1:68431071:C>T	LP	Y	30	No	NO	No	0.5	0.4	0.30103	0.39794	PD	Profoundly attenuate	RP	p.Asp482Asn|p.D482N	c.1444G>A
					RPE65	AR	NM_000329.2	c.808_809insA	p.Leu270Hisfs11|p.L270Hfs11	EX8	Het	chr1:68439240:A>AT	LP													p.Leu270Hisfs11|p.L270Hfs11	c.808_809insA
					RPE65	AR	NM_000329.2	c.809_810insGAAG	p.Trp271Lysfs11|p.W271Kfs11	EX8	Het	chr1:68439239:A>ACTTC	LP													p.Trp271Lysfs11|p.W271Kfs11	c.809_810insGAAG
					RPE65	AR	NM_000329.2	c.805_806insTGGA	p.Ser269Metfs13|p.S269Mfs13	EX8	Het	chr1:68439243:C>CTCCA	LP													p.Ser269Metfs13|p.S269Mfs13	c.805_806insTGGA
14	Female	34		RP	RPE65	AR	NM_000329.2	c.1543C>T	p.Arg515Trp|p.R515W	EX14	Hom	chr1:68429835:G>A	P	Y	34	Y	Y	No					PD	Profoundly attenuate	RP	p.Arg515Trp|p.R515W	c.1543C>T
15	Male	61		RP	RPE65	AR	NM_000329.2	c.272G>A	p.Arg91Gln|p.R91Q	EX4	Het	chr1:68444857:C>T	LP	Y	61	Y	NO	No	LP	LP	3.204	3.204	PD		LCA	p.Arg91Gln|p.R91Q	c.272G>A
					RPE65	AR	NM_000329.2	c.93A>G	p.Thr31Thr|p.T31T	EX2	Het	chr1:68448625:T>C	VUS													p.Thr31Thr|p.T31T	c.93A>G
16	Male	25		RP	RPE65	AR	NM_000329.2	c.1590C>A	p.Phe530Leu|p.F530L	EX14	Het	chr1:68429788:G>T	LP	Y	25	No	NO	No	1	1	0	0	N	slightly attenuate	RP	p.Phe530Leu|p.F530L	c.1590C>A
					RPE65	AR	NM_000329.2	c.335G>A	p.Cys112Tyr|p.C112Y	EX4	Het	chr1:68444794:C>T	VUS													p.Cys112Tyr|p.C112Y	c.335G>A
17	Male	7		RP	RPE65	AR	NM_000329.2	c.1590C>A	p.Phe530Leu|p.F530L	EX14	Het	chr1:68429788:G>T	LP	Y	4	No	NO	No	0.6	0.5	0.221849	0.30103	N	Profoundly attenuate	RP	p.Phe530Leu|p.F530L	c.1590C>A
					RPE65	AR	NM_000329.2	c.1520C>T	p.Ala507Val|p.A507V	EX14/CDS14	Het	chr1:68429858:G>A	VUS													p.Ala507Val|p.A507V	c.1520C>T
18	Male	52		RP	RPE65	AD	NM_000329.2	c.245+4A>G	-	IVS3	Het	chr1:68912389	LP	No	0.5	Y	NO	No	1	0.6	0	0.221849	PD	Attenuate	RP	-	c.245+4A>G
19	Male	29		RP	RPE65	AD	NM_000329.2	c.1051G>A	(p.Glu351Lys)	EX10	Het	chr1:68903947	VUS	Y	7	No	Y	No	HM	HM	2.903	2.903	PD	Extinct	RP	(p.Glu351Lys)	c.1051G>A
20	Female	47		RP	RPE65	AR	NM_000329.2	c.1543C>T	p.Arg515Trp|p.R515W	EX14	Hom	chr1:68429835:G>A	P	Y	47	Y	NO	No	LP	LP	3.204	3.204	PD	Profoundly attenuate	RP	p.Arg515Trp|p.R515W	c.1543C>T
21	Female	66		LCA	RPE65	AR	NM_000329	c.272G>A	p.R91Q	EX4	Het	chr1:68910540	P	Y	66	Y	NO	No	0.05	0.05	1.30103	1.30103	WYD,PD	Extinct	LCA	p.R91Q	c.272G>A
					RPE65	AR	NM_000329.2	c.93A>G	p.Thr31Thr|p.T31T	EX2	Het	chr1:68448625:T>C	VUS													p.Thr31Thr|p.T31T	c.93A>G
