# Supplementary material for: Development of a novel prediction model based on protein structure for identifying RPE65-associated inherited retinal disease (IRDs) of missense variants
Source: PeerJ. 2023 Aug 2;11:e15702. doi: 10.7717/peerj.15702 (PMC10404030; doi:10.7717/peerj.15702)
Supplement: Table S1 [file peerj-11-15702-s003.xlsx]

## Sheet: Table S1
TableS1. The digital fingerprint of RPE65 protein structure
		3-class secondary structure			8-class secondary structure								functional features
Amino acid position	Amino acid	helix	sheet	loop	β-sheet	γ-turns	β-turns	helices	helix-helix interacs	strands	β-hairpins	β-bulges	Fe2+ (iron center)	active site cavity	membrane -binding esidues	dimer-mediating residues
1	M	No	No	Yes	Yes	No	No	Yes	Yes	No	No	No	No	No	No	No
2	S	No	No	Yes	Yes	No	No	Yes	Yes	No	No	No	No	No	No	No
3	I	No	No	Yes	Yes	No	No	Yes	Yes	No	No	No	No	No	No	No
4	Q	No	No	Yes	No	No	No	Yes	Yes	No	No	No	No	No	No	No
5	V	No	No	Yes	No	No	No	Yes	Yes	No	No	No	No	No	No	No
6	E	No	No	Yes	No	No	No	Yes	Yes	No	No	No	No	No	No	No
7	H	No	No	Yes	No	No	Yes	Yes	Yes	No	No	No	No	No	No	No
8	P	No	No	Yes	No	No	Yes	Yes	Yes	No	No	No	No	No	No	No
9	A	No	No	Yes	No	No	Yes	Yes	Yes	No	No	No	No	No	No	No
10	G	No	No	Yes	No	No	Yes	Yes	Yes	No	No	No	No	No	No	No
11	G	Yes	No	No	No	No	No	Yes	Yes	No	No	No	No	No	No	No
12	Y	Yes	No	No	No	No	No	Yes	Yes	No	No	No	No	No	No	No
13	K	Yes	No	No	No	No	No	Yes	Yes	No	No	No	No	No	No	No
14	K	Yes	No	No	No	No	No	Yes	Yes	No	No	No	No	No	No	No
15	L	Yes	No	No	No	No	No	Yes	Yes	No	No	No	No	No	No	No
16	F	Yes	No	No	No	No	No	Yes	Yes	No	No	No	No	No	No	No
17	E	No	No	Yes	No	No	No	No	No	No	No	No	No	No	No	No
18	T	No	No	Yes	No	No	No	No	No	No	No	No	No	No	No	No
19	V	No	No	Yes	No	No	No	No	No	No	No	No	No	No	No	No
20	E	No	No	Yes	No	No	No	No	No	No	No	No	No	No	No	No
21	E	No	No	Yes	No	No	No	No	No	No	No	No	No	No	No	No
22	L	No	No	Yes	No	No	Yes	No	No	No	No	No	No	No	No	No
23	S	No	No	Yes	No	No	Yes	No	No	No	No	No	No	No	No	No
24	S	No	No	Yes	No	No	Yes	No	No	No	No	No	No	No	No	No
25	P	No	No	Yes	No	No	Yes	No	No	No	No	No	No	No	No	No
26	L	No	No	Yes	No	No	No	No	No	Yes	No	No	No	No	No	No
27	T	No	No	Yes	No	No	No	No	No	Yes	No	No	No	No	No	No
28	A	No	No	Yes	No	No	No	No	No	No	No	No	No	No	No	No
29	H	No	Yes	No	No	No	No	No	No	Yes	No	No	No	No	No	No
30	V	No	Yes	No	No	No	No	No	No	Yes	No	No	No	No	No	No
31	T	No	Yes	No	No	No	No	No	No	Yes	No	No	No	No	No	No
32	G	No	No	Yes	No	No	No	No	No	Yes	No	No	No	No	No	No
33	R	No	No	Yes	No	No	No	No	No	No	No	No	No	No	No	No
34	I	No	No	Yes	No	No	No	No	No	No	No	No	No	No	No	No
35	P	No	No	Yes	No	No	Yes	No	No	No	No	No	No	No	No	No
36	L	No	No	Yes	No	No	Yes	No	No	No	No	No	No	No	No	No
37	W	No	No	Yes	No	Yes	Yes	No	No	No	No	No	No	No	No	No
38	L	No	No	Yes	No	Yes	Yes	No	No	No	No	No	No	No	No	No
39	T	No	No	Yes	No	Yes	No	No	No	No	No	No	No	No	No	No
40	G	No	Yes	No	Yes	No	No	No	No	Yes	No	No	No	No	No	No
41	S	No	Yes	No	Yes	No	No	No	No	Yes	No	No	No	No	No	No
42	L	No	Yes	No	Yes	No	No	No	No	Yes	No	No	No	No	No	No
43	L	No	Yes	No	Yes	No	No	No	No	Yes	No	No	No	No	No	No
44	R	No	Yes	No	Yes	No	No	No	No	Yes	No	No	No	No	No	No
45	C	No	Yes	No	Yes	No	No	No	No	Yes	No	Yes	No	No	No	No
46	G	No	Yes	No	Yes	No	No	No	No	Yes	No	No	No	No	No	No
47	P	No	Yes	No	Yes	No	No	No	No	Yes	No	No	No	No	No	No
48	G	No	Yes	No	Yes	No	No	No	No	Yes	No	Yes	No	No	No	No
49	L	No	Yes	No	Yes	No	No	No	No	Yes	No	Yes	No	No	No	No
50	F	No	No	Yes	No	No	No	No	No	No	No	No	No	No	No	No
51	E	No	No	Yes	No	No	Yes	No	No	Yes	Yes	No	No	No	No	No
52	V	No	No	Yes	No	No	Yes	No	No	Yes	Yes	Yes	No	No	No	No
53	G	No	No	Yes	No	No	Yes	No	No	No	No	No	No	No	No	No
54	S	No	No	Yes	No	No	Yes	No	No	No	No	Yes	No	No	No	No
55	E	No	No	Yes	No	No	Yes	No	No	Yes	Yes	Yes	No	No	No	No
56	P	No	No	Yes	No	No	No	No	No	Yes	Yes	No	No	No	No	No
57	F	No	No	Yes	No	No	No	No	No	No	No	No	No	No	No	No
58	Y	No	No	Yes	No	No	No	No	No	No	No	No	No	No	No	No
59	H	No	No	Yes	No	No	Yes	No	No	No	No	No	No	No	No	No
60	L	No	No	Yes	No	No	Yes	No	No	No	No	No	No	Yes	No	No
61	F	No	No	Yes	No	No	Yes	No	No	No	No	No	No	Yes	No	No
62	D	No	No	Yes	No	No	Yes	No	No	No	No	No	No	No	No	No
63	G	No	No	Yes	No	No	Yes	No	No	No	No	No	No	No	No	No
64	Q	No	Yes	No	Yes	No	No	No	No	Yes	Yes	Yes	No	No	No	No
65	A	No	Yes	No	Yes	No	No	No	No	Yes	Yes	No	No	No	No	No
66	L	No	Yes	No	Yes	No	No	No	No	Yes	Yes	No	No	No	No	No
67	L	No	Yes	No	Yes	No	No	No	No	Yes	Yes	No	No	No	No	No
68	H	No	Yes	No	Yes	No	No	No	No	Yes	Yes	No	No	No	No	No
69	K	No	Yes	No	Yes	No	No	No	No	Yes	Yes	No	No	No	No	No
70	F	No	Yes	No	Yes	No	No	No	No	Yes	Yes	No	No	No	No	No
71	D	No	Yes	No	Yes	No	No	No	No	Yes	Yes	No	No	No	No	No
72	F	No	Yes	No	Yes	No	Yes	No	No	Yes	Yes	No	No	No	No	No
73	K	No	Yes	No	Yes	No	Yes	No	No	Yes	Yes	No	No	No	No	No
74	E	No	No	Yes	No	No	Yes	No	No	No	No	No	No	No	No	No
75	G	No	No	Yes	No	No	Yes	No	No	No	No	No	No	No	No	No
76	H	No	Yes	No	Yes	No	Yes	No	No	Yes	Yes	No	No	No	No	No
77	V	No	Yes	No	Yes	No	No	No	No	Yes	Yes	No	No	No	No	No
78	T	No	Yes	No	Yes	No	No	No	No	Yes	Yes	No	No	No	No	No
79	Y	No	Yes	No	Yes	No	No	No	No	Yes	Yes	No	No	No	No	No
80	H	No	Yes	No	Yes	No	No	No	No	Yes	Yes	No	No	No	No	No
81	R	No	Yes	No	Yes	No	No	No	No	Yes	Yes	No	No	No	No	No
82	R	No	Yes	No	Yes	No	No	No	No	Yes	Yes	No	No	No	No	No
83	F	No	Yes	No	Yes	No	No	No	No	Yes	Yes	No	No	No	No	No
84	I	No	No	Yes	No	Yes	No	No	No	No	No	No	No	No	No	No
85	R	No	No	Yes	No	Yes	No	No	No	No	No	No	No	No	No	No
86	T	No	No	Yes	No	Yes	No	No	No	No	No	No	No	No	No	No
87	D	Yes	No	No	No	No	No	Yes	No	No	No	No	No	No	No	No
88	A	Yes	No	No	No	No	No	Yes	No	No	No	No	No	No	No	No
89	Y	Yes	No	No	No	No	No	Yes	No	No	No	No	No	No	No	No
90	V	Yes	No	No	No	No	No	Yes	No	No	No	No	No	No	No	No
91	R	Yes	No	No	No	No	No	Yes	No	No	No	No	No	No	No	No
92	A	Yes	No	No	No	No	No	Yes	No	No	No	No	No	No	No	No
93	M	Yes	No	No	No	No	No	Yes	No	No	No	No	No	No	No	No
94	T	Yes	No	No	No	No	No	Yes	No	No	No	No	No	No	No	No
95	E	Yes	No	No	No	No	No	Yes	No	No	No	No	No	No	No	No
96	K	No	No	Yes	No	No	No	No	No	No	No	No	No	No	No	No
97	R	No	No	Yes	No	No	No	No	No	No	No	No	No	No	No	No
98	I	No	No	Yes	No	No	No	No	No	No	No	No	No	No	No	No
99	V	No	No	Yes	No	No	No	No	No	No	No	No	No	No	No	No
100	I	No	No	Yes	No	No	No	No	No	No	No	No	No	No	No	No
101	T	No	No	Yes	No	No	No	No	No	No	No	No	No	No	No	No
102	E	No	No	Yes	No	No	Yes	No	No	No	No	No	No	No	No	No
103	F	No	No	Yes	No	No	Yes	No	No	No	No	No	No	Yes	No	No
104	G	No	No	Yes	No	No	Yes	No	No	No	No	No	No	No	No	No
105	T	No	No	Yes	No	No	Yes	No	No	No	No	No	No	No	No	No
106	C	No	No	Yes	No	No	No	No	No	No	No	No	No	No	No	No
107	A	No	No	Yes	No	No	No	No	No	No	No	No	No	No	No	No
108	F	No	No	Yes	No	No	No	No	No	No	No	No	No	No	No	No
109	P	No	No	Yes	No	No	No	No	No	No	No	No	No	No	Yes	No
110	D	No	No	Yes	No	No	Yes	No	No	No	No	No	No	No	Yes	No
111	P	No	No	Yes	No	No	Yes	No	No	No	No	No	No	No	Yes	No
112	C	No	No	Yes	No	No	Yes	No	No	No	No	No	No	No	Yes	No
113	K	No	No	Yes	No	No	Yes	No	No	No	No	No	No	No	Yes	No
114	N	No	No	Yes	No	No	No	No	No	No	No	No	No	No	Yes	No
115	I	No	No	Yes	No	No	No	Yes	Yes	No	No	No	No	No	Yes	No
116	F	No	No	Yes	No	No	No	Yes	Yes	No	No	No	No	No	Yes	No
117	S	No	No	Yes	No	No	No	Yes	Yes	No	No	No	No	No	Yes	No
118	R	No	No	Yes	No	No	No	Yes	Yes	No	No	No	No	No	Yes	No
119	F	No	No	Yes	No	No	No	Yes	Yes	No	No	No	No	No	Yes	No
120	F	No	No	Yes	No	No	No	Yes	Yes	No	No	No	No	No	Yes	No
121	S	No	No	Yes	No	No	No	Yes	Yes	No	No	No	No	No	Yes	No
122	Y	No	No	Yes	No	No	No	Yes	Yes	No	No	No	No	No	Yes	No
123	F	No	No	Yes	No	No	No	Yes	Yes	No	No	No	No	No	Yes	No
124	R	No	No	Yes	No	No	No	No	No	No	No	No	No	No	Yes	No
125	G	No	No	Yes	No	No	No	No	No	No	No	No	No	No	Yes	No
126	V	No	No	Yes	No	No	No	No	No	No	No	No	No	No	Yes	No
127	E	No	No	Yes	No	No	No	No	No	No	No	No	No	No	No	No
128	V	No	No	Yes	No	No	No	No	No	No	No	No	No	Yes	No	No
129	T	No	No	Yes	No	No	No	No	No	No	No	No	No	Yes	No	No
130	D	No	No	Yes	No	Yes	No	No	No	No	No	No	No	No	No	No
131	N	No	No	Yes	No	Yes	No	No	No	No	No	No	No	No	No	No
132	A	No	No	Yes	No	Yes	No	No	No	No	No	No	No	No	No	No
133	L	No	No	Yes	No	Yes	No	No	No	No	No	No	No	No	No	No
134	V	No	Yes	No	Yes	No	No	No	No	No	No	Yes	No	Yes	No	No
135	N	No	Yes	No	Yes	No	No	No	No	Yes	Yes	Yes	No	No	No	No
136	V	No	Yes	No	Yes	No	No	No	No	Yes	Yes	No	No	No	No	No
137	Y	No	Yes	No	Yes	No	No	No	No	Yes	Yes	No	No	No	No	No
138	P	No	Yes	No	Yes	No	No	No	No	Yes	Yes	No	No	No	No	No
139	V	No	Yes	No	Yes	No	Yes	No	No	Yes	Yes	No	No	No	No	No
140	G	No	No	Yes	No	No	Yes	No	No	No	No	No	No	No	No	No
141	E	No	No	Yes	No	No	Yes	No	No	No	No	No	No	No	No	No
142	D	No	Yes	No	Yes	No	Yes	No	No	Yes	Yes	No	No	No	No	No
143	Y	No	Yes	No	Yes	No	No	No	No	Yes	Yes	No	No	No	No	No
144	Y	No	Yes	No	Yes	No	No	No	No	Yes	Yes	No	No	No	No	No
145	A	No	Yes	No	Yes	No	No	No	No	Yes	Yes	No	No	No	No	No
146	C	No	Yes	No	Yes	No	No	No	No	Yes	Yes	Yes	No	No	No	No
147	T	No	No	Yes	No	No	No	No	No	No	No	No	No	Yes	No	No
148	E	No	No	Yes	No	No	No	No	No	No	No	No	Yes	Yes	No	No
149	T	No	No	Yes	No	No	No	No	No	No	No	No	No	Yes	No	No
150	N	No	No	Yes	No	No	No	No	No	No	No	No	No	No	No	No
151	F	No	Yes	No	Yes	No	No	No	No	Yes	Yes	No	No	No	No	No
152	I	No	Yes	No	Yes	No	No	No	No	Yes	Yes	No	No	No	No	No
153	T	No	Yes	No	Yes	No	No	No	No	Yes	Yes	No	No	No	No	No
154	K	No	Yes	No	Yes	No	No	No	No	Yes	Yes	Yes	No	No	No	No
155	I	No	Yes	No	Yes	No	No	No	No	Yes	Yes	No	No	No	No	No
156	N	No	No	Yes	No	No	Yes	No	No	No	No	Yes	No	No	No	No
157	P	No	No	Yes	No	No	Yes	No	No	No	No	No	No	No	No	No
158	E	No	No	Yes	No	No	Yes	No	No	No	No	No	No	No	No	No
159	T	No	No	Yes	No	No	Yes	No	No	No	No	No	No	No	No	No
160	L	No	No	Yes	No	No	Yes	No	No	No	No	No	No	No	No	No
161	E	No	No	Yes	No	No	No	No	No	No	No	Yes	No	No	No	No
162	T	No	No	Yes	No	No	No	No	No	Yes	Yes	No	No	No	No	No
163	I	No	Yes	No	Yes	No	No	No	No	Yes	Yes	Yes	No	No	No	No
164	K	No	Yes	No	Yes	No	No	No	No	Yes	Yes	Yes	No	No	No	No
165	Q	No	Yes	No	Yes	No	No	No	No	Yes	Yes	No	No	No	No	No
166	V	No	Yes	No	Yes	No	No	No	No	Yes	Yes	No	No	No	No	No
167	D	No	Yes	No	Yes	No	No	No	No	Yes	Yes	No	No	No	No	No
168	L	Yes	No	No	No	No	No	Yes	No	No	No	No	No	No	No	No
169	C	Yes	No	No	No	No	No	Yes	No	No	No	No	No	No	No	No
170	N	Yes	No	No	No	No	No	Yes	No	No	No	No	No	No	No	No
171	Y	Yes	No	No	No	No	No	No	No	No	No	No	No	No	No	No
172	V	No	No	Yes	No	Yes	No	No	No	No	No	No	No	No	No	No
173	S	No	No	Yes	No	Yes	No	No	No	No	No	No	No	No	No	No
174	V	No	No	Yes	No	Yes	No	No	No	No	No	No	No	No	No	No
175	N	No	No	Yes	No	No	No	No	No	No	No	No	No	No	No	No
176	G	No	No	Yes	No	No	No	No	No	No	No	No	No	No	No	No
177	A	No	No	Yes	No	No	No	No	No	No	No	No	No	No	No	No
178	T	No	No	Yes	No	No	Yes	No	No	No	No	No	No	No	No	No
179	A	No	No	Yes	No	No	Yes	No	No	No	No	No	No	No	No	No
180	H	No	No	Yes	No	No	Yes	No	No	No	No	No	Yes	Yes	No	No
181	P	No	No	Yes	No	No	Yes	No	No	No	No	No	No	No	No	No
182	H	No	Yes	No	Yes	No	No	No	No	Yes	Yes	No	No	No	No	No
183	I	No	Yes	No	Yes	No	No	No	No	Yes	Yes	No	No	No	No	No
184	E	No	Yes	No	Yes	No	Yes	No	No	No	No	Yes	No	No	No	No
185	N	No	No	Yes	No	No	Yes	No	No	No	No	No	No	No	No	No
186	D	No	No	Yes	No	No	Yes	No	No	No	No	No	No	No	No	No
187	G	No	Yes	No	Yes	No	Yes	No	No	No	No	Yes	No	No	No	No
188	T	No	Yes	No	Yes	No	No	No	No	No	No	Yes	No	No	No	No
189	V	No	Yes	No	Yes	No	No	No	No	Yes	Yes	No	No	No	No	No
190	Y	No	Yes	No	Yes	No	No	No	No	Yes	Yes	No	No	No	No	No
191	N	No	Yes	No	Yes	No	No	No	No	Yes	Yes	No	No	No	No	No
192	I	No	Yes	No	Yes	No	No	No	No	Yes	Yes	No	No	No	No	No
193	G	No	Yes	No	Yes	No	No	No	No	Yes	Yes	No	No	No	No	No
194	N	No	Yes	No	Yes	No	No	No	No	Yes	Yes	No	No	No	No	No
195	C	No	Yes	No	Yes	No	No	No	No	Yes	Yes	No	No	No	No	No
196	F	No	Yes	No	Yes	No	No	No	No	Yes	Yes	No	No	Yes	Yes	No
197	G	No	Yes	No	Yes	No	Yes	No	No	Yes	Yes	Yes	No	No	Yes	No
198	K	No	Yes	No	No	No	Yes	No	No	No	No	No	No	No	Yes	No
199	N	No	No	Yes	No	No	Yes	No	No	No	No	No	No	No	Yes	No
200	F	No	No	Yes	Yes	No	Yes	No	No	No	No	Yes	No	No	Yes	No
201	S	No	Yes	No	Yes	No	Yes	No	No	Yes	Yes	Yes	No	No	Yes	No
202	I	No	Yes	No	Yes	No	No	No	No	Yes	Yes	No	No	No	Yes	No
203	A	No	Yes	No	Yes	No	No	No	No	Yes	Yes	No	No	No	No	No
204	Y	No	Yes	No	Yes	No	No	No	No	Yes	Yes	No	No	No	No	No
205	N	No	Yes	No	Yes	No	No	No	No	Yes	Yes	No	No	No	No	No
206	I	No	Yes	No	Yes	No	No	No	No	Yes	Yes	Yes	No	No	No	No
207	V	No	Yes	No	Yes	No	No	No	No	Yes	Yes	No	No	No	No	No
208	K	No	Yes	No	Yes	No	No	No	No	Yes	Yes	No	No	No	No	No
209	I	No	Yes	No	Yes	No	No	No	No	Yes	Yes	No	No	No	No	No
210	P	No	No	Yes	No	No	No	No	No	No	No	No	No	No	No	No
211	P	No	No	Yes	No	No	No	No	No	No	No	No	No	No	No	No
212	L	No	No	Yes	No	No	No	No	No	No	No	No	No	No	No	No
213	Q	No	No	Yes	No	No	Yes	No	No	No	No	No	No	No	No	No
214	A	No	No	Yes	No	No	Yes	No	No	No	No	No	No	No	No	No
215	D	No	No	Yes	No	No	Yes	No	No	No	No	No	No	No	No	No
216	K	No	No	Yes	No	No	Yes	No	No	No	No	No	No	No	No	No
217	E	No	No	Yes	No	No	No	No	No	No	No	No	No	No	No	No
218	D	No	No	Yes	No	No	No	No	No	No	No	No	No	No	No	No
219	P	Yes	No	No	No	No	No	Yes	No	No	No	No	No	No	No	No
220	I	Yes	No	No	No	No	No	Yes	No	No	No	No	No	No	No	No
221	S	Yes	No	No	No	No	No	Yes	No	No	No	No	No	No	No	No
222	K	Yes	No	No	No	No	No	Yes	No	No	No	No	No	No	No	No
223	S	No	No	Yes	No	No	No	No	No	No	No	No	No	No	No	No
224	E	No	Yes	No	Yes	No	No	No	No	Yes	Yes	No	No	No	No	No
225	I	No	Yes	No	Yes	No	No	No	No	Yes	Yes	No	No	No	No	No
226	V	No	Yes	No	Yes	No	No	No	No	Yes	Yes	Yes	No	No	No	No
227	V	No	Yes	No	Yes	No	No	No	No	Yes	Yes	Yes	No	No	No	No
228	Q	No	Yes	No	Yes	No	No	No	No	Yes	Yes	No	No	No	No	No
229	F	No	Yes	No	Yes	No	No	No	No	Yes	Yes	No	No	No	No	No
230	P	No	No	Yes	No	No	No	No	No	Yes	Yes	No	No	No	No	No
231	C	No	No	Yes	No	No	Yes	No	No	No	No	No	No	No	No	No
232	S	No	No	Yes	No	No	Yes	No	No	No	No	No	No	No	No	No
233	D	No	No	Yes	No	No	Yes	No	No	No	No	No	No	No	No	No
234	R	No	No	Yes	No	No	Yes	No	No	No	No	No	No	No	Yes	No
235	F	No	No	Yes	No	No	Yes	No	No	No	No	No	No	No	Yes	No
236	K	No	No	Yes	No	No	Yes	No	No	No	No	No	No	No	Yes	No
237	P	No	No	Yes	No	No	No	No	No	No	No	No	No	No	No	No
238	S	No	No	Yes	No	No	No	No	No	No	No	No	No	No	No	No
239	Y	No	No	Yes	No	No	No	No	No	No	No	No	No	Yes	No	No
240	V	No	No	Yes	No	No	No	No	No	No	No	No	No	No	No	No
241	H	No	No	Yes	No	No	No	No	No	No	No	No	Yes	Yes	No	No
242	S	No	No	Yes	No	No	No	No	No	No	No	No	No	No	No	No
243	F	No	No	Yes	No	No	No	No	No	No	No	No	No	No	No	No
244	G	No	No	Yes	No	No	No	No	No	Yes	Yes	No	No	No	No	No
245	L	No	No	Yes	No	No	No	No	No	Yes	Yes	No	No	No	No	No
246	T	No	No	Yes	No	No	Yes	No	No	No	No	No	No	No	No	No
247	P	No	No	Yes	No	No	Yes	No	No	No	No	No	No	No	No	No
248	N	No	No	Yes	No	No	Yes	No	No	No	No	No	No	No	No	No
249	Y	No	Yes	No	Yes	No	Yes	No	No	Yes	Yes	No	No	No	No	No
250	I	No	Yes	No	Yes	No	No	No	No	Yes	Yes	No	No	No	No	No
251	V	No	Yes	No	Yes	No	No	No	No	Yes	Yes	No	No	No	No	No
252	F	No	Yes	No	Yes	No	No	No	No	Yes	Yes	No	No	No	No	No
253	V	No	Yes	No	Yes	No	No	No	No	Yes	Yes	No	No	No	No	No
254	E	No	Yes	No	Yes	No	No	No	No	Yes	Yes	No	No	No	No	No
255	T	No	No	Yes	No	No	No	No	No	No	No	No	No	No	No	No
256	P	No	No	Yes	No	No	No	No	No	No	No	No	No	No	No	No
257	V	No	Yes	No	Yes	No	No	No	No	Yes	Yes	No	No	No	No	No
258	K	No	Yes	No	Yes	No	No	No	No	Yes	Yes	No	No	No	No	No
259	I	No	Yes	No	Yes	Yes	No	No	No	Yes	Yes	No	No	Yes	No	No
260	N	No	No	Yes	No	Yes	No	No	No	No	No	No	No	No	No	No
261	L	Yes	No	No	No	Yes	No	Yes	Yes	No	No	No	No	No	Yes	No
262	F	Yes	No	No	No	No	No	Yes	Yes	No	No	No	No	No	Yes	No
263	K	Yes	No	No	No	No	No	Yes	Yes	No	No	No	No	No	Yes	No
264	F	Yes	No	No	No	No	No	Yes	Yes	No	No	No	No	Yes	Yes	No
265	L	Yes	No	No	No	No	No	Yes	Yes	No	No	No	No	No	Yes	No
266	S	No	No	Yes	No	No	No	Yes	Yes	No	No	No	No	No	Yes	No
267	S	No	No	Yes	No	No	No	Yes	Yes	No	No	No	No	No	Yes	No
268	W	Yes	No	No	No	No	Yes	Yes	Yes	No	No	No	No	No	Yes	No
269	S	Yes	No	No	No	No	Yes	No	No	No	No	No	No	No	Yes	No
270	L	Yes	No	No	No	No	Yes	No	No	No	No	No	No	No	Yes	No
271	W	Yes	No	No	No	No	Yes	No	No	No	No	No	No	No	Yes	No
272	G	No	No	Yes	No	No	No	No	No	No	No	No	No	No	No	No
273	A	No	No	Yes	No	No	No	No	No	No	No	No	No	No	No	No
274	N	No	No	Yes	No	No	No	No	No	No	No	No	No	No	No	No
275	Y	Yes	No	No	No	No	No	No	No	No	No	No	No	Yes	No	No
276	M	Yes	No	No	No	No	No	Yes	No	No	No	No	No	No	No	No
277	D	Yes	No	No	No	No	No	Yes	No	No	No	No	No	No	No	No
278	C	Yes	No	No	Yes	No	No	Yes	No	No	No	No	No	No	No	No
279	F	No	Yes	No	Yes	No	No	No	No	Yes	Yes	No	No	Yes	No	No
280	E	No	Yes	No	Yes	No	No	No	No	Yes	Yes	No	No	No	No	No
281	S	No	Yes	No	No	No	No	No	No	Yes	Yes	No	No	No	No	No
282	N	No	No	Yes	No	No	Yes	No	No	No	No	No	No	No	No	No
283	E	No	No	Yes	No	No	Yes	No	No	No	No	No	No	No	No	No
284	T	No	No	Yes	No	No	Yes	No	No	No	No	No	No	No	No	No
285	M	No	No	Yes	No	No	Yes	No	No	No	No	No	No	No	No	No
286	G	No	No	Yes	No	No	No	No	No	No	No	No	No	No	No	No
287	V	No	Yes	No	Yes	No	No	No	No	Yes	Yes	No	No	No	No	No
288	W	No	Yes	No	Yes	No	No	No	No	Yes	Yes	No	No	No	No	No
289	L	No	Yes	No	Yes	No	No	No	No	Yes	Yes	No	No	No	No	No
290	H	No	Yes	No	Yes	No	No	No	No	Yes	Yes	Yes	No	No	No	No
291	I	No	Yes	No	Yes	No	No	No	No	Yes	Yes	No	No	No	No	No
292	A	No	Yes	No	Yes	No	No	No	No	Yes	Yes	No	No	No	No	No
293	D	No	Yes	No	Yes	No	Yes	No	No	Yes	Yes	Yes	No	No	No	No
294	K	No	No	Yes	No	No	Yes	No	No	No	No	No	No	No	No	No
295	K	No	No	Yes	No	No	Yes	No	No	No	No	No	No	No	No	No
296	R	No	No	Yes	No	No	Yes	No	No	No	No	No	No	No	No	No
297	K	No	Yes	No	Yes	No	Yes	No	No	No	No	Yes	No	No	No	No
298	K	No	Yes	No	Yes	No	No	No	No	Yes	Yes	Yes	No	No	No	No
299	Y	No	Yes	No	Yes	No	No	No	No	Yes	Yes	No	No	No	No	No
300	L	No	No	Yes	No	No	No	No	No	Yes	Yes	No	No	No	No	No
301	N	No	No	Yes	No	No	No	No	No	Yes	Yes	Yes	No	No	No	No
302	N	No	No	Yes	No	No	No	No	No	Yes	Yes	Yes	No	No	No	No
303	K	No	No	Yes	No	No	No	No	No	Yes	Yes	Yes	No	No	No	No
304	Y	No	Yes	No	Yes	No	No	No	No	Yes	Yes	No	No	No	No	No
305	R	No	Yes	No	Yes	No	No	No	No	Yes	Yes	No	No	No	No	No
306	T	No	Yes	No	Yes	No	No	No	No	Yes	Yes	No	No	No	No	No
307	S	No	No	Yes	No	No	No	No	No	No	No	No	No	No	No	No
308	P	No	No	Yes	No	No	No	No	No	No	No	No	No	No	No	No
309	F	No	No	Yes	No	No	No	No	No	Yes	No	No	No	No	No	No
310	N	No	No	Yes	No	No	No	No	No	Yes	No	No	No	No	No	No
311	L	No	No	Yes	No	No	No	No	No	Yes	No	No	No	No	No	No
312	F	No	No	Yes	No	No	No	No	No	Yes	No	Yes	No	Yes	No	No
313	H	No	No	Yes	No	No	No	No	No	Yes	No	Yes	Yes	Yes	No	No
314	H	No	No	Yes	No	No	No	No	No	Yes	No	No	No	No	No	No
315	I	No	Yes	No	Yes	No	No	No	No	Yes	No	Yes	No	No	No	No
316	N	No	Yes	No	Yes	No	No	No	No	Yes	No	Yes	No	No	No	No
317	T	No	Yes	No	Yes	No	No	No	No	Yes	No	No	No	No	No	No
318	Y	No	Yes	No	Yes	No	No	No	No	Yes	No	No	No	No	No	No
319	E	No	Yes	No	Yes	No	No	No	No	Yes	No	No	No	No	No	No
320	D	No	Yes	No	Yes	No	Yes	No	No	Yes	No	No	No	No	No	No
321	N	No	No	Yes	No	No	Yes	No	No	No	No	No	No	No	No	No
322	G	No	No	Yes	No	No	Yes	No	No	No	No	No	No	No	No	No
323	F	No	Yes	No	Yes	No	Yes	No	No	Yes	Yes	No	No	No	No	No
324	L	No	Yes	No	Yes	No	No	No	No	Yes	Yes	No	No	No	No	No
325	I	No	Yes	No	Yes	No	No	No	No	Yes	Yes	No	No	No	No	No
326	V	No	Yes	No	Yes	No	No	No	No	Yes	Yes	No	No	No	No	No
327	D	No	Yes	No	Yes	No	No	No	No	Yes	Yes	Yes	No	No	No	No
328	L	No	Yes	No	Yes	No	No	No	No	Yes	Yes	No	No	No	No	No
329	C	No	Yes	No	Yes	No	No	No	No	Yes	Yes	Yes	No	No	No	No
330	C	No	Yes	No	Yes	No	No	No	No	Yes	Yes	No	No	No	No	No
331	W	No	Yes	No	Yes	No	No	No	No	Yes	Yes	No	No	Yes	No	No
332	K	No	Yes	No	Yes	No	No	No	No	Yes	Yes	No	No	No	No	No
333	G	No	No	Yes	No	No	No	No	No	No	No	No	No	No	No	No
334	F	No	No	Yes	No	No	No	No	No	No	No	No	No	No	No	No
335	E	No	No	Yes	No	No	No	No	No	No	No	No	No	No	No	No
336	F	No	No	Yes	No	No	No	No	No	No	No	No	No	No	No	No
337	V	Yes	No	No	No	No	No	Yes	Yes	No	No	No	No	No	No	No
338	Y	Yes	No	No	No	No	No	Yes	Yes	No	No	No	No	Yes	No	No
339	N	Yes	No	No	No	No	No	Yes	Yes	No	No	No	No	No	No	No
340	Y	Yes	No	No	No	No	No	Yes	Yes	No	No	No	No	No	No	No
341	L	Yes	No	No	No	No	No	No	No	No	No	No	No	Yes	No	No
342	Y	No	No	Yes	No	No	No	No	No	No	No	No	No	No	No	No
343	L	Yes	No	No	No	No	No	Yes	Yes	No	No	No	No	No	No	No
344	A	Yes	No	No	No	No	No	Yes	Yes	No	No	No	No	No	No	No
345	N	Yes	No	No	No	No	No	Yes	Yes	No	No	No	No	No	No	No
346	L	Yes	No	No	No	No	No	Yes	Yes	No	No	No	No	No	No	No
347	R	Yes	No	No	No	No	No	No	No	No	No	No	No	No	No	No
348	E	No	No	Yes	No	No	No	No	No	No	No	No	No	No	No	No
349	N	No	No	Yes	No	No	No	No	No	No	No	No	No	No	No	No
350	W	Yes	No	No	No	No	No	Yes	Yes	No	No	No	No	No	No	No
351	E	Yes	No	No	No	No	No	Yes	Yes	No	No	No	No	No	No	No
352	E	Yes	No	No	No	No	No	Yes	Yes	No	No	No	No	No	No	No
353	V	Yes	No	No	No	No	No	Yes	Yes	No	No	No	No	No	No	No
354	K	Yes	No	No	No	No	No	Yes	Yes	No	No	No	No	No	No	No
355	K	Yes	No	No	No	No	No	Yes	Yes	No	No	No	No	No	No	No
356	N	Yes	No	No	No	No	No	Yes	Yes	No	No	No	No	No	No	No
357	A	Yes	No	No	No	No	No	No	No	No	No	No	No	No	No	No
358	R	No	No	Yes	No	No	No	No	No	No	No	No	No	No	No	No
359	K	No	No	Yes	No	No	No	No	No	No	No	No	No	No	No	No
360	A	No	No	Yes	No	No	No	No	No	No	No	No	No	No	No	No
361	P	No	No	Yes	No	No	No	No	No	No	No	No	No	No	No	No
362	Q	No	Yes	No	Yes	No	No	No	No	Yes	Yes	No	No	No	No	No
363	P	No	Yes	No	Yes	No	No	No	No	Yes	Yes	No	No	No	No	No
364	E	No	Yes	No	Yes	No	No	No	No	Yes	Yes	No	No	No	No	No
365	V	No	Yes	No	Yes	No	No	No	No	Yes	Yes	Yes	No	No	No	No
366	R	No	Yes	No	Yes	No	No	No	No	Yes	Yes	No	No	No	No	No
367	R	No	Yes	No	Yes	No	No	No	No	Yes	Yes	No	No	No	No	No
368	Y	No	Yes	No	Yes	No	No	No	No	Yes	Yes	No	No	No	No	No
369	V	No	Yes	No	Yes	No	No	No	No	Yes	Yes	No	No	No	No	No
370	L	No	Yes	No	Yes	No	No	No	No	Yes	Yes	No	No	No	No	No
371	P	No	Yes	No	Yes	No	Yes	No	No	Yes	Yes	No	No	No	No	No
372	L	No	No	Yes	No	No	Yes	No	No	No	No	No	No	No	No	Yes
373	N	No	No	Yes	No	No	Yes	No	No	No	No	No	No	No	No	Yes
374	I	No	No	Yes	No	No	Yes	No	No	No	No	No	No	No	No	Yes
375	D	No	No	Yes	No	No	No	No	No	No	No	No	No	No	No	Yes
376	K	No	No	Yes	No	No	No	Yes	No	No	No	No	No	No	No	Yes
377	A	No	No	Yes	No	No	No	Yes	No	No	No	No	No	No	No	Yes
378	D	No	No	Yes	No	No	Yes	Yes	No	No	No	No	No	No	No	Yes
379	T	No	No	Yes	No	No	Yes	No	No	No	No	No	No	No	No	Yes
380	G	No	No	Yes	No	No	Yes	No	No	No	No	No	No	No	No	Yes
381	K	No	No	Yes	No	No	Yes	No	No	No	No	No	No	No	No	Yes
382	N	No	No	Yes	No	No	No	No	No	No	No	No	No	No	No	Yes
383	L	No	No	Yes	No	No	No	No	No	No	No	No	No	No	No	Yes
384	V	No	No	Yes	No	No	No	No	No	No	No	No	No	No	No	Yes
385	T	No	No	Yes	No	No	No	No	No	No	No	No	No	No	No	Yes
386	L	No	No	Yes	No	No	Yes	No	No	No	No	No	No	No	No	Yes
387	P	No	No	Yes	No	No	Yes	No	No	No	No	No	No	No	No	Yes
388	N	No	No	Yes	No	No	Yes	No	No	No	No	No	No	No	No	Yes
389	T	No	No	Yes	No	No	Yes	No	No	No	No	No	No	No	No	Yes
390	T	No	No	Yes	No	No	No	No	No	No	No	No	No	No	No	Yes
391	A	No	No	Yes	No	No	No	No	No	No	No	No	No	No	No	Yes
392	T	No	Yes	No	Yes	No	No	No	No	Yes	Yes	No	No	No	No	Yes
393	A	No	Yes	No	Yes	No	No	No	No	Yes	Yes	No	No	No	No	Yes
394	I	No	Yes	No	Yes	No	No	No	No	Yes	Yes	No	No	No	No	Yes
395	L	No	Yes	No	Yes	No	No	No	No	Yes	Yes	No	No	No	No	Yes
396	C	No	Yes	No	Yes	No	Yes	No	No	No	No	Yes	No	No	No	Yes
397	S	No	No	Yes	No	No	Yes	No	No	No	No	No	No	No	No	Yes
398	D	No	No	Yes	No	No	Yes	No	No	No	No	No	No	No	No	Yes
399	E	No	Yes	No	Yes	No	Yes	No	No	No	No	Yes	No	No	No	Yes
400	T	No	Yes	No	Yes	No	No	No	No	Yes	Yes	Yes	No	No	No	Yes
401	I	No	Yes	No	Yes	No	No	No	No	Yes	Yes	No	No	No	No	Yes
402	W	No	Yes	No	Yes	No	No	No	No	Yes	Yes	No	No	No	No	Yes
403	L	No	Yes	No	Yes	No	No	No	No	Yes	Yes	No	No	No	No	Yes
404	E	No	Yes	No	Yes	No	No	No	No	Yes	Yes	No	No	No	No	Yes
405	P	No	No	Yes	No	No	No	No	No	No	No	No	No	No	No	No
406	E	No	Yes	No	Yes	No	No	No	No	Yes	No	No	No	No	No	No
407	V	No	Yes	No	Yes	No	No	No	No	Yes	No	No	No	No	No	No
408	L	No	Yes	No	Yes	No	No	No	No	Yes	No	Yes	No	No	No	No
409	F	No	Yes	No	Yes	No	No	No	No	Yes	No	Yes	No	No	No	No
410	S	No	No	Yes	No	No	No	No	No	Yes	No	No	No	No	No	No
411	G	No	No	Yes	No	No	Yes	No	No	No	No	Yes	No	No	No	No
412	P	No	No	Yes	No	No	Yes	No	No	No	No	No	No	No	No	No
413	R	No	No	Yes	No	No	Yes	No	No	No	No	Yes	No	No	No	No
414	Q	No	Yes	No	Yes	No	Yes	No	No	Yes	Yes	Yes	No	No	No	No
415	A	No	Yes	No	Yes	No	No	No	No	Yes	Yes	No	No	No	No	No
416	F	No	Yes	No	Yes	No	No	No	No	Yes	Yes	No	No	No	No	No
417	E	No	Yes	No	Yes	No	No	No	No	Yes	Yes	No	Yes	Yes	No	No
418	F	No	No	Yes	No	No	No	No	No	Yes	Yes	Yes	No	Yes	No	No
419	P	No	No	Yes	No	No	No	No	No	Yes	Yes	Yes	No	No	No	No
420	Q	No	No	Yes	No	No	No	No	No	Yes	Yes	No	No	No	No	No
421	I	No	No	Yes	No	Yes	No	No	No	No	No	No	No	No	No	No
422	N	No	No	Yes	No	Yes	No	No	No	No	No	No	No	No	No	No
423	Y	Yes	No	No	No	Yes	No	Yes	No	No	No	No	No	No	No	No
424	Q	Yes	No	No	No	No	No	Yes	No	No	No	No	No	No	No	No
425	K	Yes	No	No	No	No	No	Yes	No	No	No	No	No	No	No	No
426	Y	Yes	No	No	No	No	Yes	Yes	No	No	No	No	No	No	No	No
427	C	No	No	Yes	No	No	Yes	No	No	No	No	No	No	No	No	No
428	G	No	No	Yes	No	No	Yes	No	No	No	No	No	No	No	No	No
429	K	No	No	Yes	No	No	Yes	No	No	No	No	No	No	No	No	No
430	P	No	No	Yes	No	No	No	No	No	No	No	No	No	No	No	No
431	Y	No	No	Yes	No	No	No	No	No	No	No	No	No	No	No	No
432	T	No	No	Yes	No	No	No	No	No	No	No	No	No	No	No	No
433	Y	No	Yes	No	Yes	No	No	No	No	Yes	Yes	No	No	No	No	No
434	A	No	Yes	No	Yes	No	No	No	No	Yes	Yes	No	No	No	No	No
435	Y	No	Yes	No	Yes	No	No	No	No	Yes	Yes	No	No	No	No	No
436	G	No	Yes	No	Yes	No	No	No	No	Yes	Yes	Yes	No	No	No	No
437	L	No	Yes	No	Yes	No	No	No	No	Yes	Yes	No	No	Yes	No	No
438	G	No	Yes	No	Yes	No	No	No	No	Yes	Yes	Yes	No	No	No	No
439	L	No	Yes	No	Yes	No	Yes	No	No	Yes	Yes	No	No	Yes	No	No
440	N	No	Yes	No	Yes	No	Yes	No	No	Yes	Yes	No	No	No	No	No
441	H	No	No	Yes	No	No	Yes	No	No	No	No	No	No	No	No	No
442	F	No	No	Yes	No	No	Yes	No	No	No	No	No	No	Yes	No	No
443	V	No	Yes	No	No	No	Yes	No	No	Yes	Yes	No	No	No	No	No
444	P	No	Yes	No	No	No	No	No	No	Yes	Yes	No	No	Yes	No	No
445	D	No	Yes	No	No	No	No	No	No	Yes	Yes	Yes	No	No	No	No
446	R	No	Yes	No	No	No	No	No	No	Yes	Yes	Yes	No	No	No	No
447	L	No	Yes	No	No	No	No	No	No	Yes	Yes	No	No	No	No	No
448	C	No	Yes	No	No	No	No	No	No	Yes	Yes	No	No	No	No	No
449	K	No	Yes	No	No	No	No	No	No	Yes	Yes	No	No	No	No	No
450	L	No	Yes	No	No	No	No	No	No	Yes	Yes	No	No	No	No	No
451	N	No	Yes	No	No	No	Yes	No	No	Yes	Yes	Yes	No	No	No	No
452	V	No	No	Yes	No	No	Yes	No	No	No	No	No	No	No	No	No
453	K	No	No	Yes	No	No	Yes	No	No	No	No	No	No	No	No	No
454	T	No	No	Yes	No	No	Yes	No	No	No	No	No	No	No	No	No
455	K	No	Yes	No	Yes	No	Yes	No	No	No	No	Yes	No	No	No	No
456	E	No	Yes	No	Yes	No	No	No	No	No	No	Yes	No	No	No	No
457	T	No	Yes	No	Yes	No	No	No	No	Yes	Yes	No	No	No	No	No
458	W	No	Yes	No	Yes	No	No	No	No	Yes	Yes	No	No	No	No	No
459	V	No	Yes	No	Yes	No	No	No	No	Yes	Yes	No	No	No	No	No
460	W	No	Yes	No	Yes	No	No	No	No	Yes	Yes	No	No	No	No	No
461	Q	No	No	Yes	No	No	No	No	No	No	No	No	No	No	No	No
462	E	No	No	Yes	No	No	Yes	No	No	No	No	No	No	No	No	No
463	P	No	No	Yes	No	No	Yes	No	No	No	No	No	No	No	No	No
464	D	No	No	Yes	No	No	Yes	No	No	No	No	No	No	No	No	No
465	S	No	No	Yes	No	No	Yes	No	No	No	No	No	No	No	No	No
466	Y	No	No	Yes	No	No	No	No	No	Yes	No	No	No	No	No	No
467	P	No	No	Yes	No	No	No	No	No	Yes	No	No	No	No	No	No
468	S	No	No	Yes	No	No	No	No	No	No	No	No	No	No	No	No
469	E	No	No	Yes	No	No	No	No	No	No	No	No	Yes	No	No	No
470	P	No	No	Yes	No	No	No	No	No	No	No	No	No	No	No	No
471	I	No	Yes	No	Yes	No	No	No	No	Yes	Yes	No	No	No	No	No
472	F	No	Yes	No	Yes	No	No	No	No	Yes	Yes	No	No	No	No	No
473	V	No	Yes	No	Yes	No	No	No	No	Yes	Yes	No	No	No	No	No
474	S	No	Yes	No	Yes	No	No	No	No	Yes	Yes	No	No	No	No	No
475	H	No	No	Yes	No	No	Yes	No	No	No	No	No	No	No	No	No
476	P	No	No	Yes	No	No	Yes	No	No	No	No	No	No	No	No	No
477	D	No	No	Yes	No	No	Yes	No	No	No	No	No	No	No	No	No
478	A	No	No	Yes	No	No	Yes	No	No	No	No	No	No	No	No	No
479	L	No	No	Yes	No	No	No	No	No	No	No	No	No	No	No	No
480	E	No	No	Yes	No	No	Yes	No	No	No	No	No	No	No	No	No
481	E	No	No	Yes	No	No	Yes	No	No	No	No	No	No	No	No	No
482	D	No	No	Yes	No	Yes	Yes	No	No	No	No	No	No	No	No	No
483	D	No	No	Yes	No	Yes	Yes	No	No	No	No	No	No	No	No	No
484	G	No	Yes	No	Yes	Yes	No	No	No	Yes	Yes	No	No	No	No	No
485	V	No	Yes	No	Yes	No	No	No	No	Yes	Yes	No	No	No	No	No
486	V	No	Yes	No	Yes	No	No	No	No	Yes	Yes	No	No	No	No	No
487	L	No	Yes	No	Yes	No	No	No	No	Yes	Yes	No	No	No	No	No
488	S	No	Yes	No	Yes	No	No	No	No	Yes	Yes	No	No	No	No	No
489	V	No	Yes	No	Yes	No	No	No	No	Yes	Yes	No	No	No	No	No
490	V	No	Yes	No	Yes	No	No	No	No	Yes	Yes	No	No	No	No	No
491	V	No	Yes	No	Yes	No	No	No	No	Yes	Yes	No	No	No	No	No
492	S	No	No	Yes	No	No	No	No	No	No	No	No	No	No	No	No
493	P	No	No	Yes	No	No	No	No	No	No	No	No	No	No	No	No
494	G	No	No	Yes	No	No	Yes	No	No	No	No	No	No	No	No	No
495	A	No	No	Yes	No	No	Yes	No	No	No	No	No	No	No	No	No
496	G	No	No	Yes	No	No	Yes	No	No	No	No	No	No	No	No	No
497	Q	No	No	Yes	No	No	Yes	No	No	No	No	No	No	No	No	No
498	K	No	No	Yes	No	No	No	No	No	No	No	No	No	No	No	No
499	P	No	No	Yes	No	No	No	No	No	No	No	No	No	No	No	No
500	A	No	Yes	No	Yes	No	No	No	No	Yes	Yes	No	No	No	No	No
501	Y	No	Yes	No	Yes	No	No	No	No	Yes	Yes	No	No	No	No	No
502	L	No	Yes	No	Yes	No	No	No	No	Yes	Yes	No	No	No	No	No
503	L	No	Yes	No	Yes	No	No	No	No	Yes	Yes	No	No	No	No	No
504	I	No	Yes	No	Yes	No	No	No	No	Yes	Yes	Yes	No	No	No	No
505	L	No	Yes	No	Yes	No	No	No	No	Yes	Yes	No	No	No	No	No
506	N	No	Yes	No	Yes	No	Yes	No	No	Yes	Yes	Yes	No	No	No	No
507	A	No	No	Yes	No	No	Yes	No	No	No	No	No	No	No	No	No
508	K	No	No	Yes	No	No	Yes	No	No	No	No	No	No	No	No	No
509	D	No	No	Yes	No	No	Yes	No	No	No	No	No	No	No	No	No
510	L	No	No	Yes	No	No	Yes	No	No	No	No	Yes	No	No	No	No
511	S	No	No	Yes	No	No	No	No	No	No	No	Yes	No	No	No	No
512	E	No	No	Yes	No	No	No	No	No	Yes	Yes	No	No	No	No	No
513	V	No	Yes	No	Yes	No	No	No	No	Yes	Yes	Yes	No	No	No	No
514	A	No	Yes	No	Yes	No	No	No	No	Yes	Yes	Yes	No	No	No	No
515	R	No	Yes	No	Yes	No	No	No	No	Yes	Yes	No	No	No	No	No
516	A	No	Yes	No	Yes	No	No	No	No	Yes	Yes	No	No	No	No	No
517	E	No	Yes	No	Yes	No	No	No	No	Yes	Yes	No	No	No	No	No
518	V	No	No	Yes	No	No	No	No	No	Yes	Yes	No	No	No	No	No
519	E	No	No	Yes	No	No	No	No	No	No	No	No	No	No	No	No
520	I	No	No	Yes	No	No	No	No	No	No	No	No	No	No	No	No
521	N	No	No	Yes	No	No	No	No	No	No	No	No	No	No	No	No
522	I	No	No	Yes	No	No	No	No	No	No	No	No	No	No	No	No
523	P	No	No	Yes	No	No	No	No	No	No	No	No	No	No	No	No
524	V	No	No	Yes	No	No	No	No	No	No	No	No	No	Yes	No	No
525	T	No	No	Yes	No	No	No	No	No	No	No	No	No	No	No	No
526	F	No	Yes	No	Yes	No	No	No	No	No	No	Yes	No	Yes	No	No
527	H	No	Yes	No	Yes	No	No	No	No	No	No	Yes	Yes	Yes	No	No
528	G	No	Yes	No	Yes	No	No	No	No	Yes	No	No	No	No	No	No
529	L	No	Yes	No	Yes	No	No	No	No	Yes	No	No	No	No	No	No
530	F	No	Yes	No	Yes	No	No	No	No	Yes	No	No	No	No	No	No
531	K	No	Yes	No	Yes	No	No	No	No	Yes	No	No	No	No	No	No
532	K	No	Yes	No	Yes	No	No	No	No	Yes	No	No	No	No	No	No
533	S	No	No	Yes	No	No	No	No	No	No	No	No	No	No	No	No
