# Supplementary material for: Development of a novel prediction model based on protein structure for identifying RPE65-associated inherited retinal disease (IRDs) of missense variants
Source: PeerJ. 2023 Aug 2;11:e15702. doi: 10.7717/peerj.15702 (PMC10404030; doi:10.7717/peerj.15702)
Supplement: Table S2 [file peerj-11-15702-s004.xlsx]

## Sheet: Table S2
TableS2.the 3D sites affected in 153 pathogenic (ClinVar and HGMD databases) and 300 general population variants (UniProt database)
web	Missense	Pathogenicity	position	Missense	Disease	AA change	helix	sheet	loop	beta sheet	gamma turns	beta turns	helices	helix-helix interacs	strands	beta hairpins	beta bulges	Fe(iron center)	active site cavity	membrane -binding esidues	dimer-mediating residues	BLOSUM 62
HGMD	F16S	P	16	F16S	YES	YES	YES	NO	NO	NO	NO	NO	YES	YES	NO	NO	NO	NO	NO	NO	NO	-2
HGMD	L22P	P	22	L22P	YES	NO	NO	NO	YES	NO	NO	YES	NO	NO	NO	NO	NO	NO	NO	NO	NO	-3
HGMD	P25L	P	25	P25L	YES	NO	NO	NO	YES	NO	NO	YES	NO	NO	NO	NO	NO	NO	NO	NO	NO	-3
HGMD	G32C	P	32	G32C	YES	YES	NO	NO	YES	NO	NO	NO	NO	NO	YES	NO	NO	NO	NO	NO	NO	-3
HGMD	G32V	P	32	G32V	YES	NO	NO	NO	YES	NO	NO	NO	NO	NO	YES	NO	NO	NO	NO	NO	NO	-3
HGMD	P35L	P	35	P35L	YES	NO	NO	NO	YES	NO	NO	YES	NO	NO	NO	NO	NO	NO	NO	NO	NO	-3
HGMD	G40D	P	40	G40D	YES	YES	NO	YES	NO	YES	NO	NO	NO	NO	YES	NO	NO	NO	NO	NO	NO	-1
HGMD	G40S	P	40	G40S	YES	YES	NO	YES	NO	YES	NO	NO	NO	NO	YES	NO	NO	NO	NO	NO	NO	0
HGMD	R44Q	P	44	R44Q	YES	YES	NO	YES	NO	YES	NO	NO	NO	NO	YES	NO	NO	NO	NO	NO	NO	1
HGMD	C45R	P	45	C45R	YES	YES	NO	YES	NO	YES	NO	NO	NO	NO	YES	NO	YES	NO	NO	NO	NO	-3
HGMD	G46E	P	46	G46E	YES	YES	NO	YES	NO	YES	NO	NO	NO	NO	YES	NO	NO	NO	NO	NO	NO	-2
HGMD	F50S	P	50	F50S	YES	YES	NO	NO	YES	NO	NO	NO	NO	NO	NO	NO	NO	NO	NO	NO	NO	-2
HGMD	H59Q	P	59	H59Q	YES	YES	NO	NO	YES	NO	NO	YES	NO	NO	NO	NO	NO	NO	NO	NO	NO	0
HGMD	L60P	P	60	L60P	YES	NO	NO	NO	YES	NO	NO	YES	NO	NO	NO	NO	NO	NO	YES	NO	NO	-3
HGMD	G63E	P	63	G63E	YES	YES	NO	NO	YES	NO	NO	YES	NO	NO	NO	NO	NO	NO	NO	NO	NO	-2
HGMD	Q64E	P	64	Q64E	YES	YES	NO	YES	NO	YES	NO	NO	NO	NO	YES	YES	YES	NO	NO	NO	NO	2
HGMD	L67R	P	67	L67R	YES	YES	NO	YES	NO	YES	NO	NO	NO	NO	YES	YES	NO	NO	NO	NO	NO	-2
HGMD	H68Y	P	68	H68Y	YES	YES	NO	YES	NO	YES	NO	NO	NO	NO	YES	YES	NO	NO	NO	NO	NO	2
HGMD	F70S	P	70	F70S	YES	YES	NO	YES	NO	YES	NO	NO	NO	NO	YES	YES	NO	NO	NO	NO	NO	-2
HGMD	F70V	P	70	F70V	YES	NO	NO	YES	NO	YES	NO	NO	NO	NO	YES	YES	NO	NO	NO	NO	NO	-1
HGMD	Y79H	P	79	Y79H	YES	YES	NO	YES	NO	YES	NO	NO	NO	NO	YES	YES	NO	NO	NO	NO	NO	2
HGMD	R81I	P	81	R81I	YES	YES	NO	YES	NO	YES	NO	NO	NO	NO	YES	YES	NO	NO	NO	NO	NO	-3
HGMD	R82K	P	82	R82K	YES	NO	NO	YES	NO	YES	NO	NO	NO	NO	YES	YES	NO	NO	NO	NO	NO	2
HGMD	F83L	P	83	F83L	YES	NO	NO	YES	NO	YES	NO	NO	NO	NO	YES	YES	NO	NO	NO	NO	NO	0
HGMD	R85C	P	85	R85C	YES	YES	NO	NO	YES	NO	YES	NO	NO	NO	NO	NO	NO	NO	NO	NO	NO	-3
HGMD	R91Q	P	91	R91Q	YES	YES	YES	NO	NO	NO	NO	NO	YES	NO	NO	NO	NO	NO	NO	NO	NO	1
HGMD	R91P	P	91	R91P	YES	YES	YES	NO	NO	NO	NO	NO	YES	NO	NO	NO	NO	NO	NO	NO	NO	-2
HGMD	R91W	P	91	R91W	YES	YES	YES	NO	NO	NO	NO	NO	YES	NO	NO	NO	NO	NO	NO	NO	NO	-3
HGMD	E95Q	P	95	E95Q	YES	YES	YES	NO	NO	NO	NO	NO	YES	NO	NO	NO	NO	NO	NO	NO	NO	2
HGMD	V99I	P	99	V99I	YES	NO	NO	NO	YES	NO	NO	NO	NO	NO	NO	NO	NO	NO	NO	NO	NO	3
HGMD	T101I	P	101	T101I	YES	YES	NO	NO	YES	NO	NO	NO	NO	NO	NO	NO	NO	NO	NO	NO	NO	-1
HGMD	E102K	P	102	E102K	YES	YES	NO	NO	YES	NO	NO	YES	NO	NO	NO	NO	NO	NO	NO	NO	NO	1
HGMD	G104R	P	104	G104R	YES	YES	NO	NO	YES	NO	NO	YES	NO	NO	NO	NO	NO	NO	NO	NO	NO	-2
HGMD	G104D	P	104	G104D	YES	YES	NO	NO	YES	NO	NO	YES	NO	NO	NO	NO	NO	NO	NO	NO	NO	-1
HGMD	G104S	P	104	G104S	YES	YES	NO	NO	YES	NO	NO	YES	NO	NO	NO	NO	NO	NO	NO	NO	NO	0
HGMD	G104V	P	104	G104V	YES	NO	NO	NO	YES	NO	NO	YES	NO	NO	NO	NO	NO	NO	NO	NO	NO	-3
HGMD	C112Y	P	112	C112Y	YES	NO	NO	NO	YES	NO	NO	YES	NO	NO	NO	NO	NO	NO	NO	YES	NO	-2
HGMD	N114H	P	114	N114H	YES	YES	NO	NO	YES	NO	NO	NO	NO	NO	NO	NO	NO	NO	NO	YES	NO	1
HGMD	I115T	P	115	I115T	YES	YES	NO	NO	YES	NO	NO	NO	YES	YES	NO	NO	NO	NO	NO	YES	NO	-1
HGMD	R118S	P	118	R118S	YES	YES	NO	NO	YES	NO	NO	NO	YES	YES	NO	NO	NO	NO	NO	YES	NO	-1
HGMD	Y122H	P	122	Y122H	YES	YES	NO	NO	YES	NO	NO	NO	YES	YES	NO	NO	NO	NO	NO	YES	NO	2
HGMD	T129I	P	129	T129I	YES	YES	NO	NO	YES	NO	NO	NO	NO	NO	NO	NO	NO	NO	YES	NO	NO	-1
HGMD	N135K	P	135	N135K	YES	YES	NO	YES	NO	YES	NO	NO	NO	NO	YES	YES	YES	NO	NO	NO	NO	0
HGMD	G140E	P	140	G140E	YES	YES	NO	NO	YES	NO	NO	YES	NO	NO	NO	NO	NO	NO	NO	NO	NO	-2
HGMD	D142G	P	142	D142G	YES	YES	NO	YES	NO	YES	NO	YES	NO	NO	YES	YES	NO	NO	NO	NO	NO	-1
HGMD	Y144D	P	144	Y144D	YES	YES	NO	YES	NO	YES	NO	NO	NO	NO	YES	YES	NO	NO	NO	NO	NO	-3
HGMD	Y144H	P	144	Y144H	YES	YES	NO	YES	NO	YES	NO	NO	NO	NO	YES	YES	NO	NO	NO	NO	NO	2
HGMD	A145D	P	145	A145D	YES	YES	NO	YES	NO	YES	NO	NO	NO	NO	YES	YES	NO	NO	NO	NO	NO	-2
HGMD	A145P	P	145	A145P	YES	NO	NO	YES	NO	YES	NO	NO	NO	NO	YES	YES	NO	NO	NO	NO	NO	-1
HGMD	E148D	P	148	E148D	YES	NO	NO	NO	YES	NO	NO	NO	NO	NO	NO	NO	NO	YES	YES	NO	NO	2
HGMD	T149N	P	149	T149N	YES	NO	NO	NO	YES	NO	NO	NO	NO	NO	NO	NO	NO	NO	YES	NO	NO	0
HGMD	T153A	P	153	T153A	YES	YES	NO	YES	NO	YES	NO	NO	NO	NO	YES	YES	NO	NO	NO	NO	NO	0
HGMD	T162P	P	162	T162P	YES	YES	NO	NO	YES	NO	NO	NO	NO	NO	YES	YES	NO	NO	NO	NO	NO	-1
HGMD	D167Y	P	167	D167Y	YES	YES	NO	YES	NO	YES	NO	NO	NO	NO	YES	YES	NO	NO	NO	NO	NO	-3
HGMD	V172D	P	172	V172D	YES	YES	NO	NO	YES	NO	YES	NO	NO	NO	NO	NO	NO	NO	NO	NO	NO	-2
HGMD	H180Q	P	180	H180Q	YES	YES	NO	NO	YES	NO	NO	YES	NO	NO	NO	NO	NO	YES	YES	NO	NO	0
HGMD	P181L	P	181	P181L	YES	NO	NO	NO	YES	NO	NO	YES	NO	NO	NO	NO	NO	NO	NO	NO	NO	-3
HGMD	H182R	P	182	H182R	YES	NO	NO	YES	NO	YES	NO	NO	NO	NO	YES	YES	NO	NO	NO	NO	NO	0
HGMD	H182N	P	182	H182N	YES	YES	NO	YES	NO	YES	NO	NO	NO	NO	YES	YES	NO	NO	NO	NO	NO	1
HGMD	H182Y	P	182	H182Y	YES	YES	NO	YES	NO	YES	NO	NO	NO	NO	YES	YES	NO	NO	NO	NO	NO	2
HGMD	G187E	P	187	G187E	YES	YES	NO	YES	NO	YES	NO	YES	NO	NO	NO	NO	YES	NO	NO	NO	NO	-2
HGMD	N205S	P	205	N205S	YES	NO	NO	YES	NO	YES	NO	NO	NO	NO	YES	YES	NO	NO	NO	NO	NO	1
HGMD	I206T	P	206	I206T	YES	YES	NO	YES	NO	YES	NO	NO	NO	NO	YES	YES	YES	NO	NO	NO	NO	-1
HGMD	D215G	P	215	D215G	YES	YES	NO	NO	YES	NO	NO	YES	NO	NO	NO	NO	NO	NO	NO	NO	NO	-1
HGMD	V226I	P	226	V226I	YES	NO	NO	YES	NO	YES	NO	NO	NO	NO	YES	YES	YES	NO	NO	NO	NO	3
HGMD	Q228P	P	228	Q228P	YES	YES	NO	YES	NO	YES	NO	NO	NO	NO	YES	YES	NO	NO	NO	NO	NO	-1
HGMD	S238C	P	238	S238C	YES	NO	NO	NO	YES	NO	NO	NO	NO	NO	NO	NO	NO	NO	NO	NO	NO	-1
HGMD	Y239D	P	239	Y239D	YES	YES	NO	NO	YES	NO	NO	NO	NO	NO	NO	NO	NO	NO	YES	NO	NO	-3
HGMD	V240F	P	240	V240F	YES	NO	NO	NO	YES	NO	NO	NO	NO	NO	NO	NO	NO	NO	NO	NO	NO	-1
HGMD	H241L	P	241	H241L	YES	YES	NO	NO	YES	NO	NO	NO	NO	NO	NO	NO	NO	YES	YES	NO	NO	-3
HGMD	G244V	P	244	G244V	YES	NO	NO	NO	YES	NO	NO	NO	NO	NO	YES	YES	NO	NO	NO	NO	NO	-3
HGMD	Y249C	P	249	Y249C	YES	NO	NO	YES	NO	YES	NO	YES	NO	NO	YES	YES	NO	NO	NO	NO	NO	-2
HGMD	V251F	P	251	V251F	YES	NO	NO	YES	NO	YES	NO	NO	NO	NO	YES	YES	NO	NO	NO	NO	NO	-1
HGMD	V287F	P	287	V287F	YES	NO	NO	YES	NO	YES	NO	NO	NO	NO	YES	YES	NO	NO	NO	NO	NO	-1
HGMD	T306I	P	306	T306I	YES	YES	NO	YES	NO	YES	NO	NO	NO	NO	YES	YES	NO	NO	NO	NO	NO	-1
HGMD	H313R	P	313	H313R	YES	NO	NO	NO	YES	NO	NO	NO	NO	NO	YES	NO	YES	YES	YES	NO	NO	0
HGMD	H313Q	P	313	H313Q	YES	YES	NO	NO	YES	NO	NO	NO	NO	NO	YES	NO	YES	YES	YES	NO	NO	0
HGMD	Y318N	P	318	Y318N	YES	NO	NO	YES	NO	YES	NO	NO	NO	NO	YES	NO	NO	NO	NO	NO	NO	2
HGMD	E319K	P	319	E319K	YES	YES	NO	YES	NO	YES	NO	NO	NO	NO	YES	NO	NO	NO	NO	NO	NO	1
HGMD	L328F	P	328	L328F	YES	NO	NO	YES	NO	YES	NO	NO	NO	NO	YES	YES	NO	NO	NO	NO	NO	0
HGMD	C330Y	P	330	C330Y	YES	NO	NO	YES	NO	YES	NO	NO	NO	NO	YES	YES	NO	NO	NO	NO	NO	-2
HGMD	G333R	P	333	G333R	YES	YES	NO	NO	YES	NO	NO	NO	NO	NO	NO	NO	NO	NO	NO	NO	NO	-2
HGMD	L341S	P	341	L341S	YES	YES	YES	NO	NO	NO	NO	NO	NO	NO	NO	NO	NO	NO	YES	NO	NO	2
HGMD	V353E	P	353	V353E	YES	YES	YES	NO	NO	NO	NO	NO	YES	YES	NO	NO	NO	NO	NO	NO	NO	-2
HGMD	A360P	P	360	A360P	YES	NO	NO	NO	YES	NO	NO	NO	NO	NO	NO	NO	NO	NO	NO	NO	NO	-1
HGMD	P363R	P	363	P363R	YES	YES	NO	YES	NO	YES	NO	NO	NO	NO	YES	YES	NO	NO	NO	NO	NO	-2
HGMD	P363T	P	363	P363T	YES	YES	NO	YES	NO	YES	NO	NO	NO	NO	YES	YES	NO	NO	NO	NO	NO	-1
HGMD	Y368C	P	368	Y368C	YES	NO	NO	YES	NO	YES	NO	NO	NO	NO	YES	YES	NO	NO	NO	NO	NO	-2
HGMD	Y368H	P	368	Y368H	YES	YES	NO	YES	NO	YES	NO	NO	NO	NO	YES	YES	NO	NO	NO	NO	NO	2
HGMD	L370H	P	370	L370H	YES	YES	NO	YES	NO	YES	NO	NO	NO	NO	YES	YES	NO	NO	NO	NO	NO	-3
HGMD	P371L	P	371	P371L	YES	NO	NO	YES	NO	YES	NO	YES	NO	NO	YES	YES	NO	NO	NO	NO	NO	-3
HGMD	T385M	P	385	T385M	YES	NO	NO	NO	YES	NO	NO	NO	NO	NO	NO	NO	NO	NO	NO	NO	YES	-1
HGMD	T392P	P	392	T392P	YES	YES	NO	YES	NO	YES	NO	NO	NO	NO	YES	YES	NO	NO	NO	NO	YES	-1
HGMD	A393E	P	393	A393E	YES	YES	NO	YES	NO	YES	NO	NO	NO	NO	YES	YES	NO	NO	NO	NO	YES	-1
HGMD	A393G	P	393	A393G	YES	NO	NO	YES	NO	YES	NO	NO	NO	NO	YES	YES	NO	NO	NO	NO	YES	0
HGMD	L403P	P	403	L403P	YES	NO	NO	YES	NO	YES	NO	NO	NO	NO	YES	YES	NO	NO	NO	NO	YES	-3
HGMD	V407A	P	407	V407A	YES	NO	NO	YES	NO	YES	NO	NO	NO	NO	YES	NO	NO	NO	NO	NO	NO	0
HGMD	L408P	P	408	L408P	YES	NO	NO	YES	NO	YES	NO	NO	NO	NO	YES	NO	YES	NO	NO	NO	NO	-3
HGMD	S410P	P	410	S410P	YES	YES	NO	NO	YES	NO	NO	NO	NO	NO	YES	NO	NO	NO	NO	NO	NO	-1
HGMD	A415V	P	415	A415V	YES	NO	NO	YES	NO	YES	NO	NO	NO	NO	YES	YES	NO	NO	NO	NO	NO	0
HGMD	E417Q	P	417	E417Q	YES	YES	NO	YES	NO	YES	NO	NO	NO	NO	YES	YES	NO	YES	YES	NO	NO	2
HGMD	E417G	P	417	E417G	YES	YES	NO	YES	NO	YES	NO	NO	NO	NO	YES	YES	NO	YES	YES	NO	NO	-2
HGMD	E417V	P	417	E417V	YES	YES	NO	YES	NO	YES	NO	NO	NO	NO	YES	YES	NO	YES	YES	NO	NO	-2
HGMD	Y431C	P	431	Y431C	YES	NO	NO	NO	YES	NO	NO	NO	NO	NO	NO	NO	NO	NO	NO	NO	NO	-2
HGMD	A434E	P	434	A434E	YES	YES	NO	YES	NO	YES	NO	NO	NO	NO	YES	YES	NO	NO	NO	NO	NO	-1
HGMD	Y435C	P	435	Y435C	YES	NO	NO	YES	NO	YES	NO	NO	NO	NO	YES	YES	NO	NO	NO	NO	NO	-2
HGMD	Y435H	P	435	Y435H	YES	YES	NO	YES	NO	YES	NO	NO	NO	NO	YES	YES	NO	NO	NO	NO	NO	2
HGMD	G436V	P	436	G436V	YES	NO	NO	YES	NO	YES	NO	NO	NO	NO	YES	YES	YES	NO	NO	NO	NO	-3
HGMD	V443A	P	443	V443A	YES	NO	NO	YES	NO	NO	NO	YES	NO	NO	YES	YES	NO	NO	NO	NO	NO	0
HGMD	R446S	P	446	R446S	YES	YES	NO	YES	NO	NO	NO	NO	NO	NO	YES	YES	YES	NO	NO	NO	NO	-1
HGMD	N451Y	P	451	N451Y	YES	NO	NO	YES	NO	NO	NO	YES	NO	NO	YES	YES	YES	NO	NO	NO	NO	0
HGMD	V452G	P	452	V452G	YES	NO	NO	NO	YES	NO	NO	YES	NO	NO	NO	NO	NO	NO	NO	NO	NO	-3
HGMD	T457N	P	457	T457N	YES	NO	NO	YES	NO	YES	NO	NO	NO	NO	YES	YES	NO	NO	NO	NO	NO	0
HGMD	W460C	P	460	W460C	YES	NO	NO	YES	NO	YES	NO	NO	NO	NO	YES	YES	NO	NO	NO	NO	NO	-2
HGMD	P467A	P	467	P467A	YES	NO	NO	NO	YES	NO	NO	NO	NO	NO	YES	NO	NO	NO	NO	NO	NO	0
HGMD	P470L	P	470	P470L	YES	NO	NO	NO	YES	NO	NO	NO	NO	NO	NO	NO	NO	NO	NO	NO	NO	-3
HGMD	V473D	P	473	V473D	YES	YES	NO	YES	NO	YES	NO	NO	NO	NO	YES	YES	NO	NO	NO	NO	NO	-2
HGMD	D477G	P	477	D477G	YES	YES	NO	NO	YES	NO	NO	YES	NO	NO	NO	NO	NO	NO	NO	NO	NO	-1
HGMD	D482N	P	482	D482N	YES	YES	NO	NO	YES	NO	YES	YES	NO	NO	NO	NO	NO	NO	NO	NO	NO	1
HGMD	D482G	P	482	D482G	YES	YES	NO	NO	YES	NO	YES	YES	NO	NO	NO	NO	NO	NO	NO	NO	NO	-1
HGMD	G484D	P	484	G484D	YES	YES	NO	YES	NO	YES	YES	NO	NO	NO	YES	YES	NO	NO	NO	NO	NO	-1
HGMD	G484V	P	484	G484V	YES	NO	NO	YES	NO	YES	YES	NO	NO	NO	YES	YES	NO	NO	NO	NO	NO	-3
HGMD	L505R	P	505	L505R	YES	YES	NO	YES	NO	YES	NO	NO	NO	NO	YES	YES	NO	NO	NO	NO	NO	-2
HGMD	R515W	P	515	R515W	YES	YES	NO	YES	NO	YES	NO	NO	NO	NO	YES	YES	NO	NO	NO	NO	NO	-3
HGMD	H527R	P	527	H527R	YES	NO	NO	YES	NO	YES	NO	NO	NO	NO	NO	NO	YES	YES	YES	NO	NO	0
HGMD	H527P	P	527	H527P	YES	YES	NO	YES	NO	YES	NO	NO	NO	NO	NO	NO	YES	YES	YES	NO	NO	-2
HGMD	G528V	P	528	G528V	YES	NO	NO	YES	NO	YES	NO	NO	NO	NO	YES	NO	NO	NO	NO	NO	NO	-3
HGMD	F530L	P	530	F530L	YES	NO	NO	YES	NO	YES	NO	NO	NO	NO	YES	NO	NO	NO	NO	NO	NO	0
HGMD	S533T	P	533	S533T	YES	NO	NO	NO	YES	NO	NO	NO	NO	NO	NO	NO	NO	NO	NO	NO	NO	1
CliniVar	P467T	LP	467	P467T	YES	YES	NO	NO	YES	NO	NO	NO	NO	NO	YES	NO	NO	NO	NO	NO	NO	-1
CliniVar	P467S	LP	467	P467S	YES	YES	NO	NO	YES	NO	NO	NO	NO	NO	YES	NO	NO	NO	NO	NO	NO	-1
CliniVar	L437F	LP	437	L437F	YES	YES	NO	YES	NO	YES	NO	NO	NO	NO	YES	YES	NO	NO	YES	NO	NO	0
CliniVar	G436R	LP	436	G436R	YES	YES	NO	YES	NO	YES	NO	NO	NO	NO	YES	YES	YES	NO	NO	NO	NO	-2
CliniVar	A434V	LP	434	A434V	YES	YES	NO	YES	NO	YES	NO	NO	NO	NO	YES	YES	NO	NO	NO	NO	NO	0
CliniVar	A415T	LP	415	A415T	YES	YES	NO	YES	NO	YES	NO	NO	NO	NO	YES	YES	NO	NO	NO	NO	NO	0
CliniVar	P271S	LP	271	P271S	YES	YES	YES	NO	NO	NO	NO	YES	NO	NO	NO	NO	NO	NO	NO	YES	NO	-1
CliniVar	P327S	LP	327	P327S	YES	YES	NO	YES	NO	YES	NO	NO	NO	NO	YES	YES	YES	NO	NO	NO	NO	-1
CliniVar	P363S	LP	363	P363S	YES	YES	NO	YES	NO	YES	NO	NO	NO	NO	YES	YES	NO	NO	NO	NO	NO	-1
CliniVar	E335V	LP	335	E335V	YES	YES	NO	NO	YES	NO	NO	NO	NO	NO	NO	NO	NO	NO	NO	NO	NO	-2
CliniVar	H313P	LP	313	H313P	YES	YES	NO	NO	YES	NO	NO	NO	NO	NO	YES	NO	YES	YES	YES	NO	NO	-2
CliniVar	P308L	LP	308	P308L	YES	YES	NO	NO	YES	NO	NO	NO	NO	NO	NO	NO	NO	NO	NO	NO	NO	-3
CliniVar	R305I	LP	305	R305I	YES	YES	NO	YES	NO	YES	NO	NO	NO	NO	YES	YES	NO	NO	NO	NO	NO	-3
CliniVar	K294T	LP	294	K294T	YES	YES	NO	NO	YES	NO	NO	YES	NO	NO	NO	NO	NO	NO	NO	NO	NO	-1
CliniVar	V257G	LP	257	V257G	YES	YES	NO	YES	NO	YES	NO	NO	NO	NO	YES	YES	NO	NO	NO	NO	NO	-3
CliniVar	I225M	LP	225	I225M	YES	YES	NO	YES	NO	YES	NO	NO	NO	NO	YES	YES	NO	NO	NO	NO	NO	1
CliniVar	N191D	LP	191	N191D	YES	NO	NO	YES	NO	YES	NO	NO	NO	NO	YES	YES	NO	NO	NO	NO	NO	1
CliniVar	D186N	LP	186	D186N	YES	YES	NO	NO	YES	NO	NO	YES	NO	NO	NO	NO	NO	NO	NO	NO	NO	1
CliniVar	V136G	LP	136	V136G	YES	YES	NO	YES	NO	YES	NO	NO	NO	NO	YES	YES	NO	NO	NO	NO	NO	-3
CliniVar	H76P	P	76	H76P	YES	YES	NO	YES	NO	YES	NO	YES	NO	NO	YES	YES	NO	NO	NO	NO	NO	-2
CliniVar	G63R	LP	63	G63R	YES	YES	NO	NO	YES	NO	NO	YES	NO	NO	NO	NO	NO	NO	NO	NO	NO	-2
CliniVar	F57S	P	57	F57S	YES	YES	NO	NO	YES	NO	NO	NO	NO	NO	NO	NO	NO	NO	NO	NO	NO	-2
CliniVar	M1I	LP	1	M1I	YES	NO	NO	NO	YES	YES	NO	NO	YES	YES	NO	NO	NO	NO	NO	NO	NO	1
CliniVar	M1T	LP	1	M1T	YES	NO	NO	NO	YES	YES	NO	NO	YES	YES	NO	NO	NO	NO	NO	NO	NO	-1
uniprot	S2Y	No	2	S2Y	NO	NO	NO	NO	YES	YES	NO	NO	YES	YES	NO	NO	NO	NO	NO	NO	NO	-2
uniprot	I3T	No	3	I3T	NO	YES	NO	NO	YES	YES	NO	NO	YES	YES	NO	NO	NO	NO	NO	NO	NO	-1
uniprot	Q4R	No	4	Q4R	NO	YES	NO	NO	YES	NO	NO	NO	YES	YES	NO	NO	NO	NO	NO	NO	NO	1
uniprot	E6K	No	6	E6K	NO	YES	NO	NO	YES	NO	NO	NO	YES	YES	NO	NO	NO	NO	NO	NO	NO	1
uniprot	P8S	No	8	P8S	NO	YES	NO	NO	YES	NO	NO	YES	YES	YES	NO	NO	NO	NO	NO	NO	NO	-1
uniprot	K13E	No	13	K13E	NO	YES	YES	NO	NO	NO	NO	NO	YES	YES	NO	NO	NO	NO	NO	NO	NO	1
uniprot	T18A	No	18	T18A	NO	YES	NO	NO	YES	NO	NO	NO	NO	NO	NO	NO	NO	NO	NO	NO	NO	0
uniprot	S23P	No	23	S23P	NO	YES	NO	NO	YES	NO	NO	YES	NO	NO	NO	NO	NO	NO	NO	NO	NO	-1
uniprot	S23Y	No	23	S23Y	NO	NO	NO	NO	YES	NO	NO	YES	NO	NO	NO	NO	NO	NO	NO	NO	NO	-2
uniprot	S24L	No	24	S24L	NO	YES	NO	NO	YES	NO	NO	YES	NO	NO	NO	NO	NO	NO	NO	NO	NO	-2
uniprot	P25R	No	25	P25R	NO	YES	NO	NO	YES	NO	NO	YES	NO	NO	NO	NO	NO	NO	NO	NO	NO	-2
uniprot	L26F	No	26	L26F	NO	NO	NO	NO	YES	NO	NO	NO	NO	NO	YES	NO	NO	NO	NO	NO	NO	0
uniprot	L26P	No	26	L26P	NO	NO	NO	NO	YES	NO	NO	NO	NO	NO	YES	NO	NO	NO	NO	NO	NO	-3
uniprot	A28T	No	28	A28T	NO	YES	NO	NO	YES	NO	NO	NO	NO	NO	NO	NO	NO	NO	NO	NO	NO	0
uniprot	V30A	No	30	V30A	NO	NO	NO	YES	NO	NO	NO	NO	NO	NO	YES	NO	NO	NO	NO	NO	NO	0
uniprot	T31I	No	31	T31I	NO	YES	NO	YES	NO	NO	NO	NO	NO	NO	YES	NO	NO	NO	NO	NO	NO	-1
uniprot	G32S	No	32	G32S	NO	YES	NO	NO	YES	NO	NO	NO	NO	NO	YES	NO	NO	NO	NO	NO	NO	0
uniprot	I34F	No	34	I34F	NO	NO	NO	NO	YES	NO	NO	NO	NO	NO	NO	NO	NO	NO	NO	NO	NO	0
uniprot	I34T	No	34	I34T	NO	YES	NO	NO	YES	NO	NO	NO	NO	NO	NO	NO	NO	NO	NO	NO	NO	-1
uniprot	S41T	No	41	S41T	NO	NO	NO	YES	NO	YES	NO	NO	NO	NO	YES	NO	NO	NO	NO	NO	NO	1
uniprot	L49R	No	49	L49R	NO	YES	NO	YES	NO	YES	NO	NO	NO	NO	YES	NO	YES	NO	NO	NO	NO	-2
uniprot	F50Y	No	50	F50Y	NO	YES	NO	NO	YES	NO	NO	NO	NO	NO	NO	NO	NO	NO	NO	NO	NO	3
uniprot	V52D	No	52	V52D	NO	YES	NO	NO	YES	NO	NO	YES	NO	NO	YES	YES	YES	NO	NO	NO	NO	-2
uniprot	G53E	No	53	G53E	NO	YES	NO	NO	YES	NO	NO	YES	NO	NO	NO	NO	NO	NO	NO	NO	NO	-2
uniprot	S54A	No	54	S54A	NO	YES	NO	NO	YES	NO	NO	YES	NO	NO	NO	NO	YES	NO	NO	NO	NO	1
uniprot	S54C	No	54	S54C	NO	NO	NO	NO	YES	NO	NO	YES	NO	NO	NO	NO	YES	NO	NO	NO	NO	-1
uniprot	S54Y	No	54	S54Y	NO	NO	NO	NO	YES	NO	NO	YES	NO	NO	NO	NO	YES	NO	NO	NO	NO	-2
uniprot	E55D	No	55	E55D	NO	NO	NO	NO	YES	NO	NO	YES	NO	NO	YES	YES	YES	NO	NO	NO	NO	2
uniprot	P56S	No	56	P56S	NO	YES	NO	NO	YES	NO	NO	NO	NO	NO	YES	YES	NO	NO	NO	NO	NO	-1
uniprot	K69E	No	69	K69E	NO	YES	NO	YES	NO	YES	NO	NO	NO	NO	YES	YES	NO	NO	NO	NO	NO	1
uniprot	K69N	No	69	K69N	NO	YES	NO	YES	NO	YES	NO	NO	NO	NO	YES	YES	NO	NO	NO	NO	NO	0
uniprot	G75R	No	75	G75R	NO	YES	NO	NO	YES	NO	NO	YES	NO	NO	NO	NO	NO	NO	NO	NO	NO	-2
uniprot	F83S	No	83	F83S	NO	YES	NO	YES	NO	YES	NO	NO	NO	NO	YES	YES	NO	NO	NO	NO	NO	-2
uniprot	I84T	No	84	I84T	NO	YES	NO	NO	YES	NO	YES	NO	NO	NO	NO	NO	NO	NO	NO	NO	NO	-1
uniprot	I84V	No	84	I84V	NO	NO	NO	NO	YES	NO	YES	NO	NO	NO	NO	NO	NO	NO	NO	NO	NO	3
uniprot	R85L	No	85	R85L	NO	YES	NO	NO	YES	NO	YES	NO	NO	NO	NO	NO	NO	NO	NO	NO	NO	-2
uniprot	Y89F	No	89	Y89F	NO	YES	YES	NO	NO	NO	NO	NO	YES	NO	NO	NO	NO	NO	NO	NO	NO	3
uniprot	A92S	No	92	A92S	NO	YES	YES	NO	NO	NO	NO	NO	YES	NO	NO	NO	NO	NO	NO	NO	NO	1
uniprot	E95K	No	95	E95K	NO	YES	YES	NO	NO	NO	NO	NO	YES	NO	NO	NO	NO	NO	NO	NO	NO	1
uniprot	I100K	No	100	I100K	NO	YES	NO	NO	YES	NO	NO	NO	NO	NO	NO	NO	NO	NO	NO	NO	NO	-3
uniprot	C106Y	No	106	C106Y	NO	NO	NO	NO	YES	NO	NO	NO	NO	NO	NO	NO	NO	NO	NO	NO	NO	-2
uniprot	A107T	No	107	A107T	NO	YES	NO	NO	YES	NO	NO	NO	NO	NO	NO	NO	NO	NO	NO	NO	NO	0
uniprot	A107V	No	107	A107V	NO	NO	NO	NO	YES	NO	NO	NO	NO	NO	NO	NO	NO	NO	NO	NO	NO	0
uniprot	K113Q	No	113	K113Q	NO	YES	NO	NO	YES	NO	NO	YES	NO	NO	NO	NO	NO	NO	NO	YES	NO	1
uniprot	I115V	No	115	I115V	NO	NO	NO	NO	YES	NO	NO	NO	YES	YES	NO	NO	NO	NO	NO	YES	NO	3
uniprot	F116L	No	116	F116L	NO	NO	NO	NO	YES	NO	NO	NO	YES	YES	NO	NO	NO	NO	NO	YES	NO	0
uniprot	S117Y	No	117	S117Y	NO	NO	NO	NO	YES	NO	NO	NO	YES	YES	NO	NO	NO	NO	NO	YES	NO	-2
uniprot	R118K	No	118	R118K	NO	NO	NO	NO	YES	NO	NO	NO	YES	YES	NO	NO	NO	NO	NO	YES	NO	2
uniprot	F119V	No	119	F119V	NO	NO	NO	NO	YES	NO	NO	NO	YES	YES	NO	NO	NO	NO	NO	YES	NO	-1
uniprot	F120V	No	120	F120V	NO	NO	NO	NO	YES	NO	NO	NO	YES	YES	NO	NO	NO	NO	NO	YES	NO	-1
uniprot	F123L	No	123	F123L	NO	NO	NO	NO	YES	NO	NO	NO	YES	YES	NO	NO	NO	NO	NO	YES	NO	0
uniprot	R124Q	No	124	R124Q	NO	YES	NO	NO	YES	NO	NO	NO	NO	NO	NO	NO	NO	NO	NO	YES	NO	1
uniprot	V126I	No	126	V126I	NO	NO	NO	NO	YES	NO	NO	NO	NO	NO	NO	NO	NO	NO	NO	YES	NO	3
uniprot	N131D	No	131	N131D	NO	YES	NO	NO	YES	NO	YES	NO	NO	NO	NO	NO	NO	NO	NO	NO	NO	1
uniprot	L133P	No	133	L133P	NO	NO	NO	NO	YES	NO	YES	NO	NO	NO	NO	NO	NO	NO	NO	NO	NO	-3
uniprot	V134I	No	134	V134I	NO	NO	NO	YES	NO	YES	NO	NO	NO	NO	NO	NO	YES	NO	YES	NO	NO	3
uniprot	V136F	No	136	V136F	NO	NO	NO	YES	NO	YES	NO	NO	NO	NO	YES	YES	NO	NO	NO	NO	NO	-1
uniprot	V136L	No	136	V136L	NO	NO	NO	YES	NO	YES	NO	NO	NO	NO	YES	YES	NO	NO	NO	NO	NO	1
uniprot	E141K	No	141	E141K	NO	YES	NO	NO	YES	NO	NO	YES	NO	NO	NO	NO	NO	NO	NO	NO	NO	1
uniprot	D142N	No	142	D142N	NO	YES	NO	YES	NO	YES	NO	YES	NO	NO	YES	YES	NO	NO	NO	NO	NO	1
uniprot	T147I	No	147	T147I	NO	YES	NO	NO	YES	NO	NO	NO	NO	NO	NO	NO	NO	NO	YES	NO	NO	-1
uniprot	T149A	No	149	T149A	NO	YES	NO	NO	YES	NO	NO	NO	NO	NO	NO	NO	NO	NO	YES	NO	NO	0
uniprot	I152V	No	152	I152V	NO	NO	NO	YES	NO	YES	NO	NO	NO	NO	YES	YES	NO	NO	NO	NO	NO	3
uniprot	T153S	No	153	T153S	NO	NO	NO	YES	NO	YES	NO	NO	NO	NO	YES	YES	NO	NO	NO	NO	NO	1
uniprot	I155T	No	155	I155T	NO	YES	NO	YES	NO	YES	NO	NO	NO	NO	YES	YES	NO	NO	NO	NO	NO	-1
uniprot	I155V	No	155	I155V	NO	NO	NO	YES	NO	YES	NO	NO	NO	NO	YES	YES	NO	NO	NO	NO	NO	3
uniprot	E158Q	No	158	E158Q	NO	YES	NO	NO	YES	NO	NO	YES	NO	NO	NO	NO	NO	NO	NO	NO	NO	2
uniprot	T159S	No	159	T159S	NO	NO	NO	NO	YES	NO	NO	YES	NO	NO	NO	NO	NO	NO	NO	NO	NO	1
uniprot	I163V	No	163	I163V	NO	NO	NO	YES	NO	YES	NO	NO	NO	NO	YES	YES	YES	NO	NO	NO	NO	3
uniprot	K164T	No	164	K164T	NO	YES	NO	YES	NO	YES	NO	NO	NO	NO	YES	YES	YES	NO	NO	NO	NO	-1
uniprot	V166I	No	166	V166I	NO	NO	NO	YES	NO	YES	NO	NO	NO	NO	YES	YES	NO	NO	NO	NO	NO	3
uniprot	D167A	No	167	D167A	NO	YES	NO	YES	NO	YES	NO	NO	NO	NO	YES	YES	NO	NO	NO	NO	NO	-2
uniprot	L168V	No	168	L168V	NO	NO	YES	NO	NO	NO	NO	NO	YES	NO	NO	NO	NO	NO	NO	NO	NO	1
uniprot	Y171C	No	171	Y171C	NO	NO	YES	NO	NO	NO	NO	NO	NO	NO	NO	NO	NO	NO	NO	NO	NO	-2
uniprot	G176A	No	176	G176A	NO	NO	NO	NO	YES	NO	NO	NO	NO	NO	NO	NO	NO	NO	NO	NO	NO	0
uniprot	A177T	No	177	A177T	NO	YES	NO	NO	YES	NO	NO	NO	NO	NO	NO	NO	NO	NO	NO	NO	NO	0
uniprot	T178A	No	178	T178A	NO	YES	NO	NO	YES	NO	NO	YES	NO	NO	NO	NO	NO	NO	NO	NO	NO	0
uniprot	H180R	No	180	H180R	NO	NO	NO	NO	YES	NO	NO	YES	NO	NO	NO	NO	NO	YES	YES	NO	NO	0
uniprot	H180Y	No	180	H180Y	NO	YES	NO	NO	YES	NO	NO	YES	NO	NO	NO	NO	NO	YES	YES	NO	NO	2
uniprot	I183S	No	183	I183S	NO	YES	NO	YES	NO	YES	NO	NO	NO	NO	YES	YES	NO	NO	NO	NO	NO	-2
uniprot	I183T	No	183	I183T	NO	YES	NO	YES	NO	YES	NO	NO	NO	NO	YES	YES	NO	NO	NO	NO	NO	-1
uniprot	G187R	No	187	G187R	NO	YES	NO	YES	NO	YES	NO	YES	NO	NO	NO	NO	YES	NO	NO	NO	NO	-2
uniprot	V189L	No	189	V189L	NO	NO	NO	YES	NO	YES	NO	NO	NO	NO	YES	YES	NO	NO	NO	NO	NO	1
uniprot	I192T	No	192	I192T	NO	YES	NO	YES	NO	YES	NO	NO	NO	NO	YES	YES	NO	NO	NO	NO	NO	-1
uniprot	G193S	No	193	G193S	NO	YES	NO	YES	NO	YES	NO	NO	NO	NO	YES	YES	NO	NO	NO	NO	NO	0
uniprot	C195F	No	195	C195F	NO	YES	NO	YES	NO	YES	NO	NO	NO	NO	YES	YES	NO	NO	NO	NO	NO	-2
uniprot	G197R	No	197	G197R	NO	YES	NO	YES	NO	YES	NO	YES	NO	NO	YES	YES	YES	NO	NO	YES	NO	-2
uniprot	N199D	No	199	N199D	NO	YES	NO	NO	YES	NO	NO	YES	NO	NO	NO	NO	NO	NO	NO	YES	NO	1
uniprot	N199K	No	199	N199K	NO	YES	NO	NO	YES	NO	NO	YES	NO	NO	NO	NO	NO	NO	NO	YES	NO	0
uniprot	N199S	No	199	N199S	NO	NO	NO	NO	YES	NO	NO	YES	NO	NO	NO	NO	NO	NO	NO	YES	NO	1
uniprot	Y204F	No	204	Y204F	NO	YES	NO	YES	NO	YES	NO	NO	NO	NO	YES	YES	NO	NO	NO	NO	NO	3
uniprot	Y204H	No	204	Y204H	NO	YES	NO	YES	NO	YES	NO	NO	NO	NO	YES	YES	NO	NO	NO	NO	NO	2
uniprot	N205H	No	205	N205H	NO	YES	NO	YES	NO	YES	NO	NO	NO	NO	YES	YES	NO	NO	NO	NO	NO	1
uniprot	I206V	No	206	I206V	NO	NO	NO	YES	NO	YES	NO	NO	NO	NO	YES	YES	YES	NO	NO	NO	NO	3
uniprot	V207L	No	207	V207L	NO	NO	NO	YES	NO	YES	NO	NO	NO	NO	YES	YES	NO	NO	NO	NO	NO	1
uniprot	I209F	No	209	I209F	NO	NO	NO	YES	NO	YES	NO	NO	NO	NO	YES	YES	NO	NO	NO	NO	NO	0
uniprot	L212R	No	212	L212R	NO	YES	NO	NO	YES	NO	NO	NO	NO	NO	NO	NO	NO	NO	NO	NO	NO	-2
uniprot	A214S	No	214	A214S	NO	YES	NO	NO	YES	NO	NO	YES	NO	NO	NO	NO	NO	NO	NO	NO	NO	1
uniprot	K216E	No	216	K216E	NO	YES	NO	NO	YES	NO	NO	YES	NO	NO	NO	NO	NO	NO	NO	NO	NO	1
uniprot	E217D	No	217	E217D	NO	NO	NO	NO	YES	NO	NO	NO	NO	NO	NO	NO	NO	NO	NO	NO	NO	2
uniprot	E217G	No	217	E217G	NO	YES	NO	NO	YES	NO	NO	NO	NO	NO	NO	NO	NO	NO	NO	NO	NO	-2
uniprot	E217Q	No	217	E217Q	NO	YES	NO	NO	YES	NO	NO	NO	NO	NO	NO	NO	NO	NO	NO	NO	NO	2
uniprot	P219L	No	219	P219L	NO	NO	YES	NO	NO	NO	NO	NO	YES	NO	NO	NO	NO	NO	NO	NO	NO	-3
uniprot	P219Q	No	219	P219Q	NO	YES	YES	NO	NO	NO	NO	NO	YES	NO	NO	NO	NO	NO	NO	NO	NO	-1
uniprot	P219S	No	219	P219S	NO	YES	YES	NO	NO	NO	NO	NO	YES	NO	NO	NO	NO	NO	NO	NO	NO	-1
uniprot	I220V	No	220	I220V	NO	NO	YES	NO	NO	NO	NO	NO	YES	NO	NO	NO	NO	NO	NO	NO	NO	3
uniprot	S221N	No	221	S221N	NO	NO	YES	NO	NO	NO	NO	NO	YES	NO	NO	NO	NO	NO	NO	NO	NO	1
uniprot	K222N	No	222	K222N	NO	YES	YES	NO	NO	NO	NO	NO	YES	NO	NO	NO	NO	NO	NO	NO	NO	0
uniprot	E224A	No	224	E224A	NO	YES	NO	YES	NO	YES	NO	NO	NO	NO	YES	YES	NO	NO	NO	NO	NO	-1
uniprot	I225S	No	225	I225S	NO	YES	NO	YES	NO	YES	NO	NO	NO	NO	YES	YES	NO	NO	NO	NO	NO	-2
uniprot	I225T	No	225	I225T	NO	YES	NO	YES	NO	YES	NO	NO	NO	NO	YES	YES	NO	NO	NO	NO	NO	-1
uniprot	I225V	No	225	I225V	NO	NO	NO	YES	NO	YES	NO	NO	NO	NO	YES	YES	NO	NO	NO	NO	NO	3
uniprot	V226F	No	226	V226F	NO	NO	NO	YES	NO	YES	NO	NO	NO	NO	YES	YES	YES	NO	NO	NO	NO	-1
uniprot	Q228K	No	228	Q228K	NO	YES	NO	YES	NO	YES	NO	NO	NO	NO	YES	YES	NO	NO	NO	NO	NO	1
uniprot	F229L	No	229	F229L	NO	NO	NO	YES	NO	YES	NO	NO	NO	NO	YES	YES	NO	NO	NO	NO	NO	0
uniprot	P230S	No	230	P230S	NO	YES	NO	NO	YES	NO	NO	NO	NO	NO	YES	YES	NO	NO	NO	NO	NO	-1
uniprot	P230T	No	230	P230T	NO	YES	NO	NO	YES	NO	NO	NO	NO	NO	YES	YES	NO	NO	NO	NO	NO	-1
uniprot	R234L	No	234	R234L	NO	YES	NO	NO	YES	NO	NO	YES	NO	NO	NO	NO	NO	NO	NO	YES	NO	-2
uniprot	P237L	No	237	P237L	NO	NO	NO	NO	YES	NO	NO	NO	NO	NO	NO	NO	NO	NO	NO	NO	NO	-3
uniprot	Y239H	No	239	Y239H	NO	YES	NO	NO	YES	NO	NO	NO	NO	NO	NO	NO	NO	NO	YES	NO	NO	2
uniprot	S242G	No	242	S242G	NO	YES	NO	NO	YES	NO	NO	NO	NO	NO	NO	NO	NO	NO	NO	NO	NO	0
uniprot	S242N	No	242	S242N	NO	NO	NO	NO	YES	NO	NO	NO	NO	NO	NO	NO	NO	NO	NO	NO	NO	1
uniprot	E254D	No	254	E254D	NO	NO	NO	YES	NO	YES	NO	NO	NO	NO	YES	YES	NO	NO	NO	NO	NO	2
uniprot	T255S	No	255	T255S	NO	NO	NO	NO	YES	NO	NO	NO	NO	NO	NO	NO	NO	NO	NO	NO	NO	1
uniprot	P256L	No	256	P256L	NO	NO	NO	NO	YES	NO	NO	NO	NO	NO	NO	NO	NO	NO	NO	NO	NO	-3
uniprot	P256S	No	256	P256S	NO	YES	NO	NO	YES	NO	NO	NO	NO	NO	NO	NO	NO	NO	NO	NO	NO	-1
uniprot	K258T	No	258	K258T	NO	YES	NO	YES	NO	YES	NO	NO	NO	NO	YES	YES	NO	NO	NO	NO	NO	-1
uniprot	L261P	No	261	L261P	NO	NO	YES	NO	NO	NO	YES	NO	YES	YES	NO	NO	NO	NO	NO	YES	NO	-3
uniprot	K263Q	No	263	K263Q	NO	YES	YES	NO	NO	NO	NO	NO	YES	YES	NO	NO	NO	NO	NO	YES	NO	1
uniprot	F264L	No	264	F264L	NO	NO	YES	NO	NO	NO	NO	NO	YES	YES	NO	NO	NO	NO	YES	YES	NO	0
uniprot	L265H	No	265	L265H	NO	YES	YES	NO	NO	NO	NO	NO	YES	YES	NO	NO	NO	NO	NO	YES	NO	-3
uniprot	L265I	No	265	L265I	NO	NO	YES	NO	NO	NO	NO	NO	YES	YES	NO	NO	NO	NO	NO	YES	NO	2
uniprot	L265P	No	265	L265P	NO	NO	YES	NO	NO	NO	NO	NO	YES	YES	NO	NO	NO	NO	NO	YES	NO	-3
uniprot	W268R	No	268	W268R	NO	YES	YES	NO	NO	NO	NO	YES	YES	YES	NO	NO	NO	NO	NO	YES	NO	-3
uniprot	L270I	No	270	L270I	NO	NO	YES	NO	NO	NO	NO	YES	NO	NO	NO	NO	NO	NO	NO	YES	NO	2
uniprot	W271C	No	271	W271C	NO	NO	YES	NO	NO	NO	NO	YES	NO	NO	NO	NO	NO	NO	NO	YES	NO	-2
uniprot	A273D	No	273	A273D	NO	YES	NO	NO	YES	NO	NO	NO	NO	NO	NO	NO	NO	NO	NO	NO	NO	-2
uniprot	A273S	No	273	A273S	NO	YES	NO	NO	YES	NO	NO	NO	NO	NO	NO	NO	NO	NO	NO	NO	NO	1
uniprot	A273V	No	273	A273V	NO	NO	NO	NO	YES	NO	NO	NO	NO	NO	NO	NO	NO	NO	NO	NO	NO	0
uniprot	Y275H	No	275	Y275H	NO	YES	YES	NO	NO	NO	NO	NO	NO	NO	NO	NO	NO	NO	YES	NO	NO	2
uniprot	M276T	No	276	M276T	NO	NO	YES	NO	NO	NO	NO	NO	YES	NO	NO	NO	NO	NO	NO	NO	NO	-1
uniprot	M276V	No	276	M276V	NO	YES	YES	NO	NO	NO	NO	NO	YES	NO	NO	NO	NO	NO	NO	NO	NO	1
uniprot	F279V	No	279	F279V	NO	NO	NO	YES	NO	YES	NO	NO	NO	NO	YES	YES	NO	NO	YES	NO	NO	-1
uniprot	E280Q	No	280	E280Q	NO	YES	NO	YES	NO	YES	NO	NO	NO	NO	YES	YES	NO	NO	NO	NO	NO	2
uniprot	T284I	No	284	T284I	NO	YES	NO	NO	YES	NO	NO	YES	NO	NO	NO	NO	NO	NO	NO	NO	NO	-1
uniprot	M285I	No	285	M285I	NO	YES	NO	NO	YES	NO	NO	YES	NO	NO	NO	NO	NO	NO	NO	NO	NO	1
uniprot	W288C	No	288	W288C	NO	NO	NO	YES	NO	YES	NO	NO	NO	NO	YES	YES	NO	NO	NO	NO	NO	-2
uniprot	W288L	No	288	W288L	NO	YES	NO	YES	NO	YES	NO	NO	NO	NO	YES	YES	NO	NO	NO	NO	NO	-2
uniprot	L289I	No	289	L289I	NO	NO	NO	YES	NO	YES	NO	NO	NO	NO	YES	YES	NO	NO	NO	NO	NO	2
uniprot	H290Y	No	290	H290Y	NO	YES	NO	YES	NO	YES	NO	NO	NO	NO	YES	YES	YES	NO	NO	NO	NO	2
uniprot	I291T	No	291	I291T	NO	YES	NO	YES	NO	YES	NO	NO	NO	NO	YES	YES	NO	NO	NO	NO	NO	-1
uniprot	I291V	No	291	I291V	NO	NO	NO	YES	NO	YES	NO	NO	NO	NO	YES	YES	NO	NO	NO	NO	NO	3
uniprot	D293E	No	293	D293E	NO	NO	NO	YES	NO	YES	NO	YES	NO	NO	YES	YES	YES	NO	NO	NO	NO	2
uniprot	K294N	No	294	K294N	NO	YES	NO	NO	YES	NO	NO	YES	NO	NO	NO	NO	NO	NO	NO	NO	NO	0
uniprot	K295R	No	295	K295R	NO	NO	NO	NO	YES	NO	NO	YES	NO	NO	NO	NO	NO	NO	NO	NO	NO	2
uniprot	R296G	No	296	R296G	NO	YES	NO	NO	YES	NO	NO	YES	NO	NO	NO	NO	NO	NO	NO	NO	NO	-2
uniprot	K298N	No	298	K298N	NO	YES	NO	YES	NO	YES	NO	NO	NO	NO	YES	YES	YES	NO	NO	NO	NO	0
uniprot	K298R	No	298	K298R	NO	NO	NO	YES	NO	YES	NO	NO	NO	NO	YES	YES	YES	NO	NO	NO	NO	2
uniprot	K298T	No	298	K298T	NO	YES	NO	YES	NO	YES	NO	NO	NO	NO	YES	YES	YES	NO	NO	NO	NO	-1
uniprot	Y299C	No	299	Y299C	NO	NO	NO	YES	NO	YES	NO	NO	NO	NO	YES	YES	NO	NO	NO	NO	NO	-2
uniprot	L300F	No	300	L300F	NO	NO	NO	NO	YES	NO	NO	NO	NO	NO	YES	YES	NO	NO	NO	NO	NO	0
uniprot	N301T	No	301	N301T	NO	NO	NO	NO	YES	NO	NO	NO	NO	NO	YES	YES	YES	NO	NO	NO	NO	0
uniprot	N302D	No	302	N302D	NO	YES	NO	NO	YES	NO	NO	NO	NO	NO	YES	YES	YES	NO	NO	NO	NO	1
uniprot	N302S	No	302	N302S	NO	NO	NO	NO	YES	NO	NO	NO	NO	NO	YES	YES	YES	NO	NO	NO	NO	1
uniprot	P308S	No	308	P308S	NO	YES	NO	NO	YES	NO	NO	NO	NO	NO	NO	NO	NO	NO	NO	NO	NO	-1
uniprot	F309I	No	309	F309I	NO	NO	NO	NO	YES	NO	NO	NO	NO	NO	YES	NO	NO	NO	NO	NO	NO	0
uniprot	I315V	No	315	I315V	NO	NO	NO	YES	NO	YES	NO	NO	NO	NO	YES	NO	YES	NO	NO	NO	NO	3
uniprot	V326M	No	326	V326M	NO	YES	NO	YES	NO	YES	NO	NO	NO	NO	YES	YES	NO	NO	NO	NO	NO	1
uniprot	G333V	No	333	G333V	NO	NO	NO	NO	YES	NO	NO	NO	NO	NO	NO	NO	NO	NO	NO	NO	NO	-3
uniprot	E335Q	No	335	E335Q	NO	YES	NO	NO	YES	NO	NO	NO	NO	NO	NO	NO	NO	NO	NO	NO	NO	2
uniprot	V337A	No	337	V337A	NO	NO	YES	NO	NO	NO	NO	NO	YES	YES	NO	NO	NO	NO	NO	NO	NO	0
uniprot	N339S	No	339	N339S	NO	NO	YES	NO	NO	NO	NO	NO	YES	YES	NO	NO	NO	NO	NO	NO	NO	1
uniprot	N339T	No	339	N339T	NO	NO	YES	NO	NO	NO	NO	NO	YES	YES	NO	NO	NO	NO	NO	NO	NO	0
uniprot	Y342H	No	342	Y342H	NO	YES	NO	NO	YES	NO	NO	NO	NO	NO	NO	NO	NO	NO	NO	NO	NO	2
uniprot	A344D	No	344	A344D	NO	YES	YES	NO	NO	NO	NO	NO	YES	YES	NO	NO	NO	NO	NO	NO	NO	-2
uniprot	A344P	No	344	A344P	NO	NO	YES	NO	NO	NO	NO	NO	YES	YES	NO	NO	NO	NO	NO	NO	NO	-1
uniprot	A344V	No	344	A344V	NO	NO	YES	NO	NO	NO	NO	NO	YES	YES	NO	NO	NO	NO	NO	NO	NO	0
uniprot	R347C	No	347	R347C	NO	YES	YES	NO	NO	NO	NO	NO	NO	NO	NO	NO	NO	NO	NO	NO	NO	-3
uniprot	E348K	No	348	E348K	NO	YES	NO	NO	YES	NO	NO	NO	NO	NO	NO	NO	NO	NO	NO	NO	NO	1
uniprot	W350C	No	350	W350C	NO	NO	YES	NO	NO	NO	NO	NO	YES	YES	NO	NO	NO	NO	NO	NO	NO	-2
uniprot	E352D	No	352	E352D	NO	NO	YES	NO	NO	NO	NO	NO	YES	YES	NO	NO	NO	NO	NO	NO	NO	2
uniprot	N356K	No	356	N356K	NO	YES	YES	NO	NO	NO	NO	NO	YES	YES	NO	NO	NO	NO	NO	NO	NO	0
uniprot	N356M	No	356	N356M	NO	NO	YES	NO	NO	NO	NO	NO	YES	YES	NO	NO	NO	NO	NO	NO	NO	-2
uniprot	A357S	No	357	A357S	NO	YES	YES	NO	NO	NO	NO	NO	NO	NO	NO	NO	NO	NO	NO	NO	NO	1
uniprot	R358G	No	358	R358G	NO	YES	NO	NO	YES	NO	NO	NO	NO	NO	NO	NO	NO	NO	NO	NO	NO	-2
uniprot	K359N	No	359	K359N	NO	YES	NO	NO	YES	NO	NO	NO	NO	NO	NO	NO	NO	NO	NO	NO	NO	0
uniprot	A360S	No	360	A360S	NO	YES	NO	NO	YES	NO	NO	NO	NO	NO	NO	NO	NO	NO	NO	NO	NO	1
uniprot	A360V	No	360	A360V	NO	NO	NO	NO	YES	NO	NO	NO	NO	NO	NO	NO	NO	NO	NO	NO	NO	0
uniprot	P361H	No	361	P361H	NO	YES	NO	NO	YES	NO	NO	NO	NO	NO	NO	NO	NO	NO	NO	NO	NO	0
uniprot	P361S	No	361	P361S	NO	YES	NO	NO	YES	NO	NO	NO	NO	NO	NO	NO	NO	NO	NO	NO	NO	-1
uniprot	P363H	No	363	P363H	NO	YES	NO	YES	NO	YES	NO	NO	NO	NO	YES	YES	NO	NO	NO	NO	NO	0
uniprot	P363L	No	363	P363L	NO	NO	NO	YES	NO	YES	NO	NO	NO	NO	YES	YES	NO	NO	NO	NO	NO	-3
uniprot	P363S	No	363	P363S	NO	YES	NO	YES	NO	YES	NO	NO	NO	NO	YES	YES	NO	NO	NO	NO	NO	-1
uniprot	R366G	No	366	R366G	NO	YES	NO	YES	NO	YES	NO	NO	NO	NO	YES	YES	NO	NO	NO	NO	NO	-2
uniprot	R367T	No	367	R367T	NO	YES	NO	YES	NO	YES	NO	NO	NO	NO	YES	YES	NO	NO	NO	NO	NO	-1
uniprot	L370I	No	370	L370I	NO	NO	NO	YES	NO	YES	NO	NO	NO	NO	YES	YES	NO	NO	NO	NO	NO	2
uniprot	L372S	No	372	L372S	NO	YES	NO	NO	YES	NO	NO	YES	NO	NO	NO	NO	NO	NO	NO	NO	YES	2
uniprot	N373D	No	373	N373D	NO	YES	NO	NO	YES	NO	NO	YES	NO	NO	NO	NO	NO	NO	NO	NO	YES	1
uniprot	D375E	No	375	D375E	NO	NO	NO	NO	YES	NO	NO	NO	NO	NO	NO	NO	NO	NO	NO	NO	YES	2
uniprot	A377G	No	377	A377G	NO	NO	NO	NO	YES	NO	NO	NO	YES	NO	NO	NO	NO	NO	NO	NO	YES	0
uniprot	D378V	No	378	D378V	NO	YES	NO	NO	YES	NO	NO	YES	YES	NO	NO	NO	NO	NO	NO	NO	YES	-3
uniprot	T379R	No	379	T379R	NO	YES	NO	NO	YES	NO	NO	YES	NO	NO	NO	NO	NO	NO	NO	NO	YES	-1
uniprot	K381N	No	381	K381N	NO	YES	NO	NO	YES	NO	NO	YES	NO	NO	NO	NO	NO	NO	NO	NO	YES	0
uniprot	L386P	No	386	L386P	NO	NO	NO	NO	YES	NO	NO	YES	NO	NO	NO	NO	NO	NO	NO	NO	YES	-3
uniprot	P387A	No	387	P387A	NO	NO	NO	NO	YES	NO	NO	YES	NO	NO	NO	NO	NO	NO	NO	NO	YES	0
uniprot	P387R	No	387	P387R	NO	YES	NO	NO	YES	NO	NO	YES	NO	NO	NO	NO	NO	NO	NO	NO	YES	-2
uniprot	P387S	No	387	P387S	NO	YES	NO	NO	YES	NO	NO	YES	NO	NO	NO	NO	NO	NO	NO	NO	YES	-1
uniprot	P387T	No	387	P387T	NO	YES	NO	NO	YES	NO	NO	YES	NO	NO	NO	NO	NO	NO	NO	NO	YES	-1
uniprot	N388D	No	388	N388D	NO	YES	NO	NO	YES	NO	NO	YES	NO	NO	NO	NO	NO	NO	NO	NO	YES	1
uniprot	N388S	No	388	N388S	NO	NO	NO	NO	YES	NO	NO	YES	NO	NO	NO	NO	NO	NO	NO	NO	YES	1
uniprot	T389I	No	389	T389I	NO	YES	NO	NO	YES	NO	NO	YES	NO	NO	NO	NO	NO	NO	NO	NO	YES	-1
uniprot	T390P	No	390	T390P	NO	YES	NO	NO	YES	NO	NO	NO	NO	NO	NO	NO	NO	NO	NO	NO	YES	-1
uniprot	T390S	No	390	T390S	NO	NO	NO	NO	YES	NO	NO	NO	NO	NO	NO	NO	NO	NO	NO	NO	YES	1
uniprot	A391D	No	391	A391D	NO	YES	NO	NO	YES	NO	NO	NO	NO	NO	NO	NO	NO	NO	NO	NO	YES	-2
uniprot	T392I	No	392	T392I	NO	YES	NO	YES	NO	YES	NO	NO	NO	NO	YES	YES	NO	NO	NO	NO	YES	-1
uniprot	T392N	No	392	T392N	NO	NO	NO	YES	NO	YES	NO	NO	NO	NO	YES	YES	NO	NO	NO	NO	YES	0
uniprot	I394M	No	394	I394M	NO	YES	NO	YES	NO	YES	NO	NO	NO	NO	YES	YES	NO	NO	NO	NO	YES	1
uniprot	I394V	No	394	I394V	NO	NO	NO	YES	NO	YES	NO	NO	NO	NO	YES	YES	NO	NO	NO	NO	YES	3
uniprot	L395M	No	395	L395M	NO	YES	NO	YES	NO	YES	NO	NO	NO	NO	YES	YES	NO	NO	NO	NO	YES	2
uniprot	L395R	No	395	L395R	NO	YES	NO	YES	NO	YES	NO	NO	NO	NO	YES	YES	NO	NO	NO	NO	YES	-2
uniprot	C396R	No	396	C396R	NO	YES	NO	YES	NO	YES	NO	YES	NO	NO	NO	NO	YES	NO	NO	NO	YES	-3
uniprot	S397N	No	397	S397N	NO	NO	NO	NO	YES	NO	NO	YES	NO	NO	NO	NO	NO	NO	NO	NO	YES	1
uniprot	T400I	No	400	T400I	NO	YES	NO	YES	NO	YES	NO	NO	NO	NO	YES	YES	YES	NO	NO	NO	YES	-1
uniprot	I401V	No	401	I401V	NO	NO	NO	YES	NO	YES	NO	NO	NO	NO	YES	YES	NO	NO	NO	NO	YES	3
uniprot	L403M	No	403	L403M	NO	YES	NO	YES	NO	YES	NO	NO	NO	NO	YES	YES	NO	NO	NO	NO	YES	2
uniprot	P405H	No	405	P405H	NO	YES	NO	NO	YES	NO	NO	NO	NO	NO	NO	NO	NO	NO	NO	NO	NO	0
uniprot	P405S	No	405	P405S	NO	YES	NO	NO	YES	NO	NO	NO	NO	NO	NO	NO	NO	NO	NO	NO	NO	-1
uniprot	F409S	No	409	F409S	NO	YES	NO	YES	NO	YES	NO	NO	NO	NO	YES	NO	YES	NO	NO	NO	NO	-2
uniprot	P412T	No	412	P412T	NO	YES	NO	NO	YES	NO	NO	YES	NO	NO	NO	NO	NO	NO	NO	NO	NO	-1
uniprot	R413G	No	413	R413G	NO	YES	NO	NO	YES	NO	NO	YES	NO	NO	NO	NO	YES	NO	NO	NO	NO	-2
uniprot	R413P	No	413	R413P	NO	YES	NO	NO	YES	NO	NO	YES	NO	NO	NO	NO	YES	NO	NO	NO	NO	-2
uniprot	R413S	No	413	R413S	NO	YES	NO	NO	YES	NO	NO	YES	NO	NO	NO	NO	YES	NO	NO	NO	NO	-1
uniprot	F416S	No	416	F416S	NO	YES	NO	YES	NO	YES	NO	NO	NO	NO	YES	YES	NO	NO	NO	NO	NO	-2
uniprot	E417D	No	417	E417D	NO	NO	NO	YES	NO	YES	NO	NO	NO	NO	YES	YES	NO	YES	YES	NO	NO	2
uniprot	F418L	No	418	F418L	NO	NO	NO	NO	YES	NO	NO	NO	NO	NO	YES	YES	YES	NO	YES	NO	NO	0
uniprot	Q420L	No	420	Q420L	NO	YES	NO	NO	YES	NO	NO	NO	NO	NO	YES	YES	NO	NO	NO	NO	NO	-2
uniprot	N422K	No	422	N422K	NO	YES	NO	NO	YES	NO	YES	NO	NO	NO	NO	NO	NO	NO	NO	NO	NO	0
uniprot	N422S	No	422	N422S	NO	NO	NO	NO	YES	NO	YES	NO	NO	NO	NO	NO	NO	NO	NO	NO	NO	1
uniprot	Q424P	No	424	Q424P	NO	YES	YES	NO	NO	NO	NO	NO	YES	NO	NO	NO	NO	NO	NO	NO	NO	-1
uniprot	K425M	No	425	K425M	NO	YES	YES	NO	NO	NO	NO	NO	YES	NO	NO	NO	NO	NO	NO	NO	NO	-1
uniprot	K425R	No	425	K425R	NO	NO	YES	NO	NO	NO	NO	NO	YES	NO	NO	NO	NO	NO	NO	NO	NO	2
uniprot	C427R	No	427	C427R	NO	YES	NO	NO	YES	NO	NO	YES	NO	NO	NO	NO	NO	NO	NO	NO	NO	-3
uniprot	P430H	No	430	P430H	NO	YES	NO	NO	YES	NO	NO	NO	NO	NO	NO	NO	NO	NO	NO	NO	NO	0
uniprot	P430S	No	430	P430S	NO	YES	NO	NO	YES	NO	NO	NO	NO	NO	NO	NO	NO	NO	NO	NO	NO	-1
uniprot	Y431H	No	431	Y431H	NO	YES	NO	NO	YES	NO	NO	NO	NO	NO	NO	NO	NO	NO	NO	NO	NO	2
uniprot	T432K	No	432	T432K	NO	YES	NO	NO	YES	NO	NO	NO	NO	NO	NO	NO	NO	NO	NO	NO	NO	-1
uniprot	Y433H	No	433	Y433H	NO	YES	NO	YES	NO	YES	NO	NO	NO	NO	YES	YES	NO	NO	NO	NO	NO	2
uniprot	Y433N	No	433	Y433N	NO	NO	NO	YES	NO	YES	NO	NO	NO	NO	YES	YES	NO	NO	NO	NO	NO	2
uniprot	L439F	No	439	L439F	NO	NO	NO	YES	NO	YES	NO	YES	NO	NO	YES	YES	NO	NO	YES	NO	NO	0
uniprot	H441N	No	441	H441N	NO	YES	NO	NO	YES	NO	NO	YES	NO	NO	NO	NO	NO	NO	NO	NO	NO	1
uniprot	D445E	No	445	D445E	NO	NO	NO	YES	NO	NO	NO	NO	NO	NO	YES	YES	YES	NO	NO	NO	NO	2
uniprot	R446G	No	446	R446G	NO	YES	NO	YES	NO	NO	NO	NO	NO	NO	YES	YES	YES	NO	NO	NO	NO	-2
uniprot	L447F	No	447	L447F	NO	NO	NO	YES	NO	NO	NO	NO	NO	NO	YES	YES	NO	NO	NO	NO	NO	0
uniprot	C448W	No	448	C448W	NO	NO	NO	YES	NO	NO	NO	NO	NO	NO	YES	YES	NO	NO	NO	NO	NO	-2
uniprot	K453E	No	453	K453E	NO	YES	NO	NO	YES	NO	NO	YES	NO	NO	NO	NO	NO	NO	NO	NO	NO	1
uniprot	T454S	No	454	T454S	NO	NO	NO	NO	YES	NO	NO	YES	NO	NO	NO	NO	NO	NO	NO	NO	NO	1
uniprot	K455R	No	455	K455R	NO	NO	NO	YES	NO	YES	NO	YES	NO	NO	NO	NO	YES	NO	NO	NO	NO	2
uniprot	V459A	No	459	V459A	NO	NO	NO	YES	NO	YES	NO	NO	NO	NO	YES	YES	NO	NO	NO	NO	NO	0
uniprot	E462D	No	462	E462D	NO	NO	NO	NO	YES	NO	NO	YES	NO	NO	NO	NO	NO	NO	NO	NO	NO	2
uniprot	Y466H	No	466	Y466H	NO	YES	NO	NO	YES	NO	NO	NO	NO	NO	YES	NO	NO	NO	NO	NO	NO	2
uniprot	P470R	No	470	P470R	NO	YES	NO	NO	YES	NO	NO	NO	NO	NO	NO	NO	NO	NO	NO	NO	NO	-2
uniprot	V473F	No	473	V473F	NO	NO	NO	YES	NO	YES	NO	NO	NO	NO	YES	YES	NO	NO	NO	NO	NO	-1
uniprot	V473I	No	473	V473I	NO	NO	NO	YES	NO	YES	NO	NO	NO	NO	YES	YES	NO	NO	NO	NO	NO	3
uniprot	V473L	No	473	V473L	NO	NO	NO	YES	NO	YES	NO	NO	NO	NO	YES	YES	NO	NO	NO	NO	NO	1
uniprot	H475Q	No	475	H475Q	NO	YES	NO	NO	YES	NO	NO	YES	NO	NO	NO	NO	NO	NO	NO	NO	NO	0
uniprot	H475Y	No	475	H475Y	NO	YES	NO	NO	YES	NO	NO	YES	NO	NO	NO	NO	NO	NO	NO	NO	NO	2
uniprot	P476R	No	476	P476R	NO	YES	NO	NO	YES	NO	NO	YES	NO	NO	NO	NO	NO	NO	NO	NO	NO	-2
uniprot	P476T	No	476	P476T	NO	YES	NO	NO	YES	NO	NO	YES	NO	NO	NO	NO	NO	NO	NO	NO	NO	-1
uniprot	A478D	No	478	A478D	NO	YES	NO	NO	YES	NO	NO	YES	NO	NO	NO	NO	NO	NO	NO	NO	NO	-2
uniprot	A478G	No	478	A478G	NO	NO	NO	NO	YES	NO	NO	YES	NO	NO	NO	NO	NO	NO	NO	NO	NO	0
uniprot	A478V	No	478	A478V	NO	NO	NO	NO	YES	NO	NO	YES	NO	NO	NO	NO	NO	NO	NO	NO	NO	0
uniprot	L479V	No	479	L479V	NO	NO	NO	NO	YES	NO	NO	NO	NO	NO	NO	NO	NO	NO	NO	NO	NO	1
uniprot	D483V	No	483	D483V	NO	YES	NO	NO	YES	NO	YES	YES	NO	NO	NO	NO	NO	NO	NO	NO	NO	-3
uniprot	V485I	No	485	V485I	NO	NO	NO	YES	NO	YES	NO	NO	NO	NO	YES	YES	NO	NO	NO	NO	NO	3
uniprot	S488R	No	488	S488R	NO	YES	NO	YES	NO	YES	NO	NO	NO	NO	YES	YES	NO	NO	NO	NO	NO	-1
uniprot	V489M	No	489	V489M	NO	YES	NO	YES	NO	YES	NO	NO	NO	NO	YES	YES	NO	NO	NO	NO	NO	1
uniprot	V490M	No	490	V490M	NO	YES	NO	YES	NO	YES	NO	NO	NO	NO	YES	YES	NO	NO	NO	NO	NO	1
uniprot	V491A	No	491	V491A	NO	NO	NO	YES	NO	YES	NO	NO	NO	NO	YES	YES	NO	NO	NO	NO	NO	0
uniprot	V491L	No	491	V491L	NO	NO	NO	YES	NO	YES	NO	NO	NO	NO	YES	YES	NO	NO	NO	NO	NO	1
uniprot	A495G	No	495	A495G	NO	NO	NO	NO	YES	NO	NO	YES	NO	NO	NO	NO	NO	NO	NO	NO	NO	0
uniprot	Q497H	No	497	Q497H	NO	YES	NO	NO	YES	NO	NO	YES	NO	NO	NO	NO	NO	NO	NO	NO	NO	0
uniprot	Q497R	No	497	Q497R	NO	YES	NO	NO	YES	NO	NO	YES	NO	NO	NO	NO	NO	NO	NO	NO	NO	1
uniprot	K498N	No	498	K498N	NO	YES	NO	NO	YES	NO	NO	NO	NO	NO	NO	NO	NO	NO	NO	NO	NO	0
uniprot	A507G	No	507	A507G	NO	NO	NO	NO	YES	NO	NO	YES	NO	NO	NO	NO	NO	NO	NO	NO	NO	0
uniprot	A507V	No	507	A507V	NO	NO	NO	NO	YES	NO	NO	YES	NO	NO	NO	NO	NO	NO	NO	NO	NO	0
uniprot	K508N	No	508	K508N	NO	YES	NO	NO	YES	NO	NO	YES	NO	NO	NO	NO	NO	NO	NO	NO	NO	0
uniprot	D509N	No	509	D509N	NO	YES	NO	NO	YES	NO	NO	YES	NO	NO	NO	NO	NO	NO	NO	NO	NO	1
uniprot	E512K	No	512	E512K	NO	YES	NO	NO	YES	NO	NO	NO	NO	NO	YES	YES	NO	NO	NO	NO	NO	1
uniprot	V513A	No	513	V513A	NO	NO	NO	YES	NO	YES	NO	NO	NO	NO	YES	YES	YES	NO	NO	NO	NO	0
uniprot	V513F	No	513	V513F	NO	NO	NO	YES	NO	YES	NO	NO	NO	NO	YES	YES	YES	NO	NO	NO	NO	-1
uniprot	V518A	No	518	V518A	NO	NO	NO	NO	YES	NO	NO	NO	NO	NO	YES	YES	NO	NO	NO	NO	NO	0
uniprot	V518M	No	518	V518M	NO	YES	NO	NO	YES	NO	NO	NO	NO	NO	YES	YES	NO	NO	NO	NO	NO	1
uniprot	N521I	No	521	N521I	NO	YES	NO	NO	YES	NO	NO	NO	NO	NO	NO	NO	NO	NO	NO	NO	NO	-3
uniprot	N521T	No	521	N521T	NO	NO	NO	NO	YES	NO	NO	NO	NO	NO	NO	NO	NO	NO	NO	NO	NO	0
uniprot	I522V	No	522	I522V	NO	NO	NO	NO	YES	NO	NO	NO	NO	NO	NO	NO	NO	NO	NO	NO	NO	3
uniprot	P523S	No	523	P523S	NO	YES	NO	NO	YES	NO	NO	NO	NO	NO	NO	NO	NO	NO	NO	NO	NO	-1
uniprot	T525I	No	525	T525I	NO	YES	NO	NO	YES	NO	NO	NO	NO	NO	NO	NO	NO	NO	NO	NO	NO	-1
uniprot	H527Y	No	527	H527Y	NO	YES	NO	YES	NO	YES	NO	NO	NO	NO	NO	NO	YES	YES	YES	NO	NO	2
uniprot	S533F	No	533	S533F	NO	YES	NO	NO	YES	NO	NO	NO	NO	NO	NO	NO	NO	NO	NO	NO	NO	-2
uniprot	S533Y	No	533	S533Y	NO	NO	NO	NO	YES	NO	NO	NO	NO	NO	NO	NO	NO	NO	NO	NO	NO	-2
