# Supplementary figures and images for: Development of a novel prediction model based on protein structure for identifying RPE65-associated inherited retinal disease (IRDs) of missense variants
Source: PeerJ journal article supplement (doi:10.7717/peerj.15702), 2023-08-02

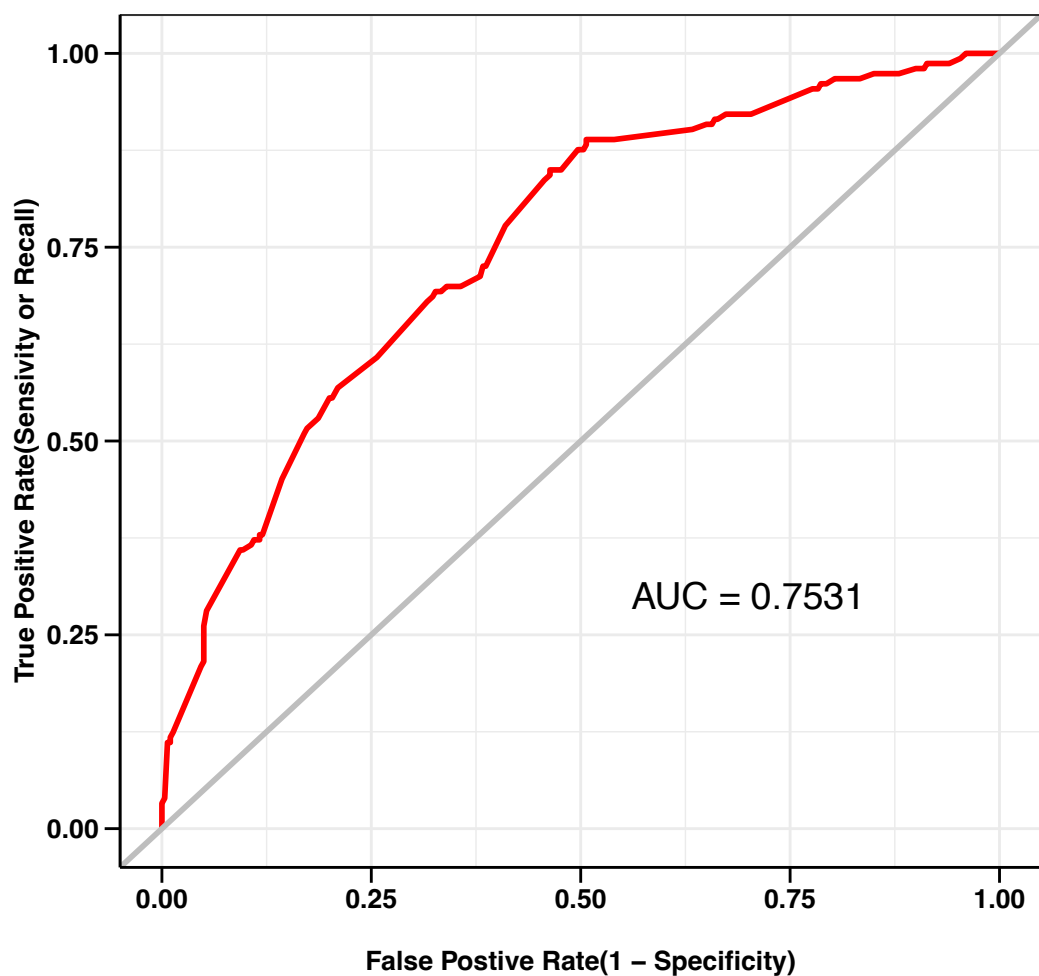

Supplement: code.zip [file code.zip]

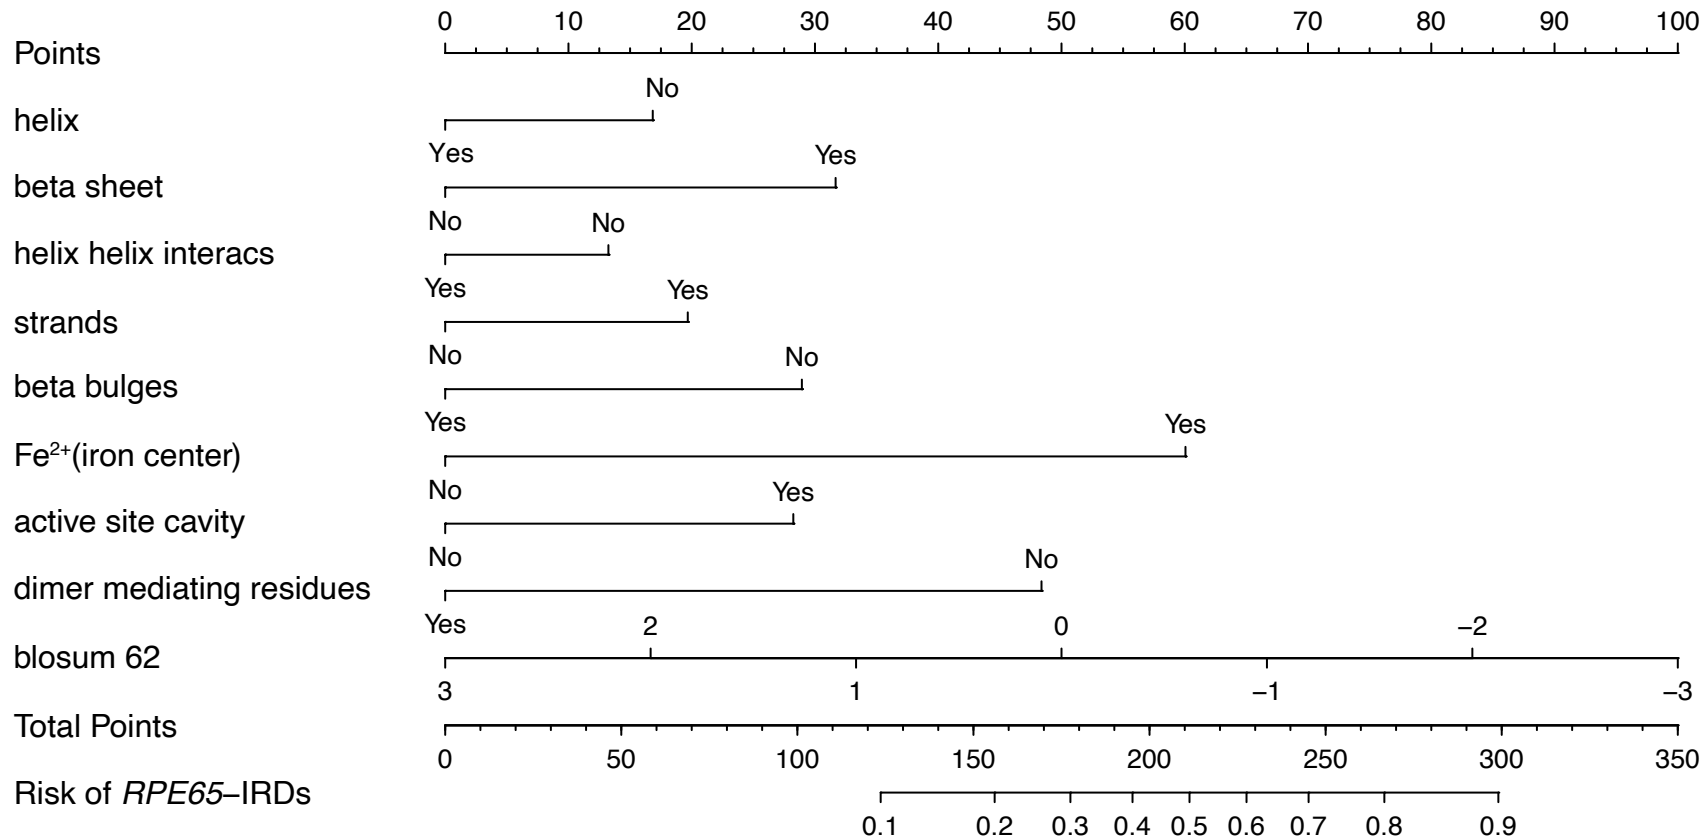

Supplement: code.zip [file code.zip]

Binomial Deviance

15 15 15 15 15 14 14 14 13 12 9 9 8 6 6 4 3 1

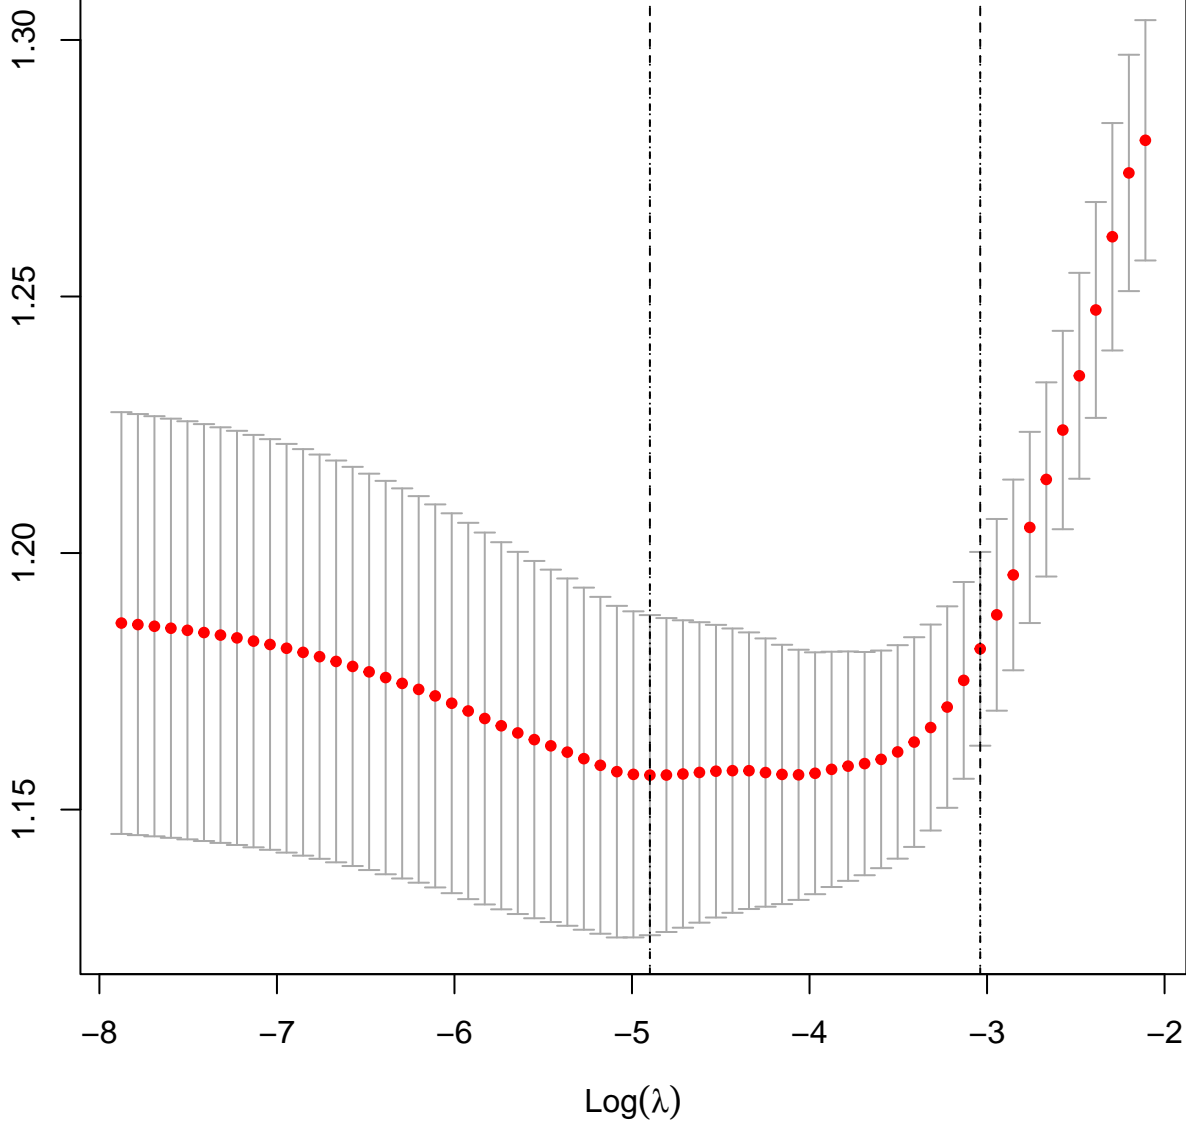

Supplement: code.zip [file code.zip]

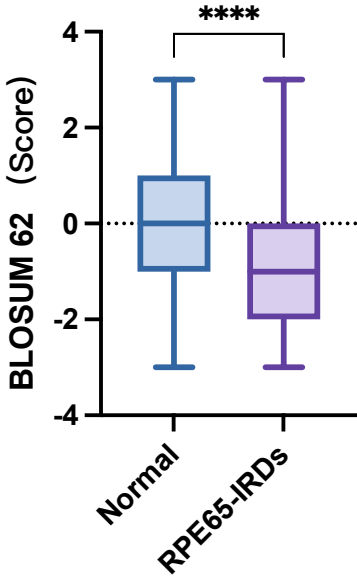

Supplement: code.zip [file code.zip]

Missense-VUS

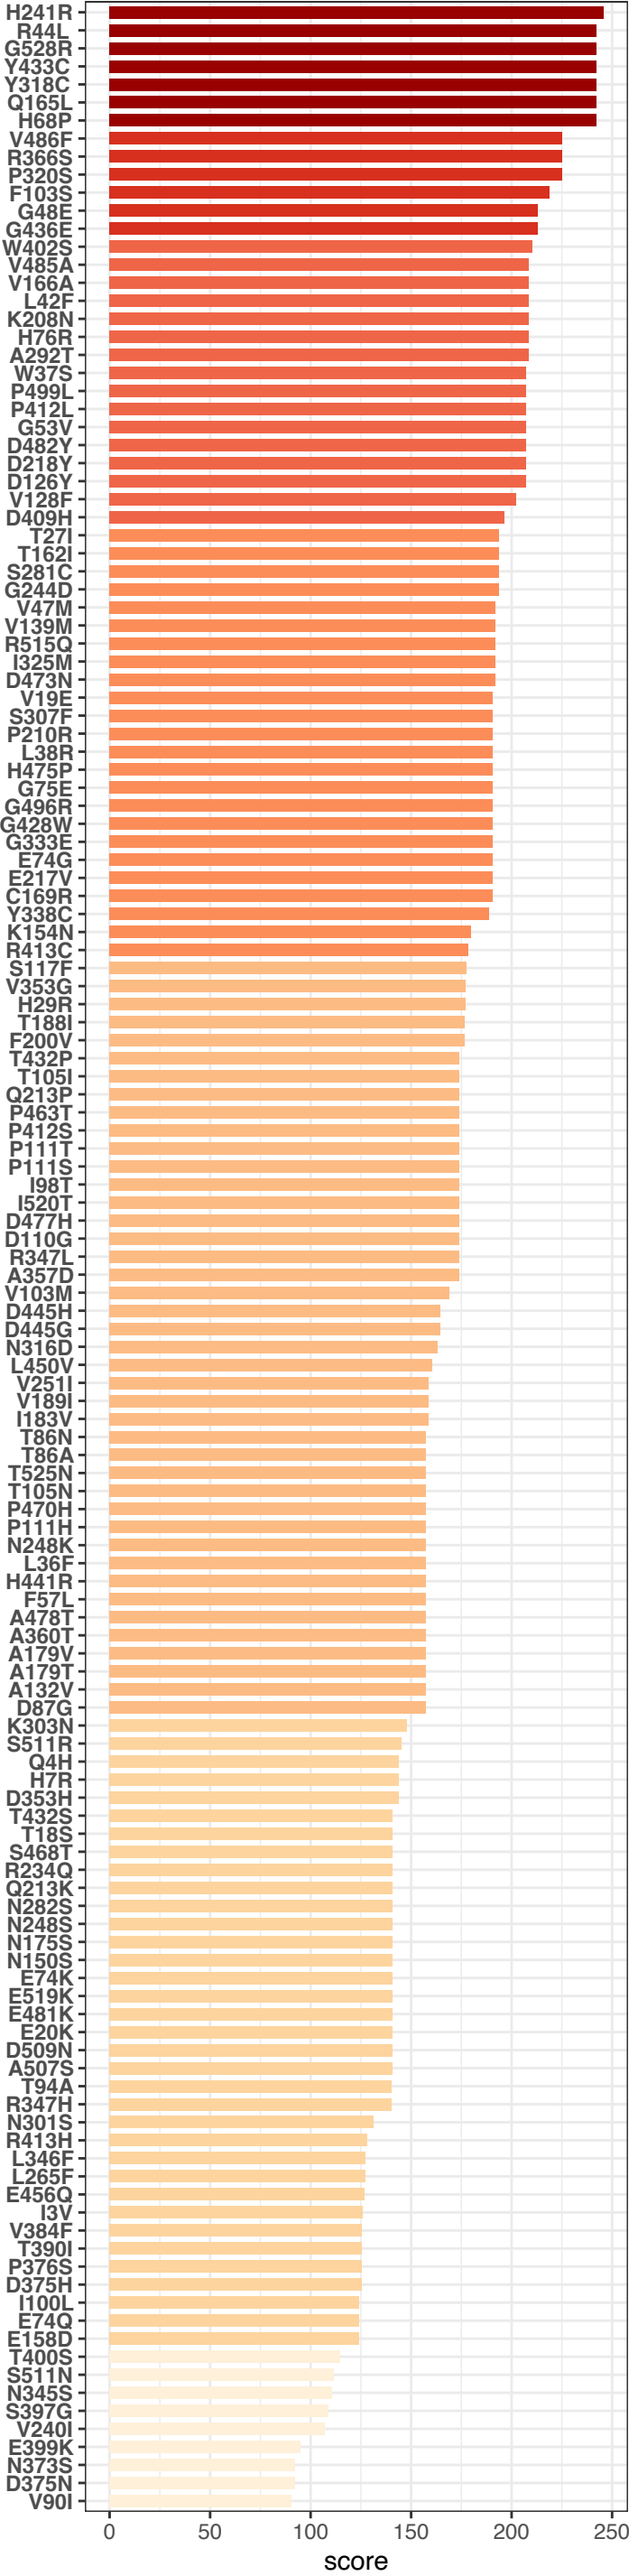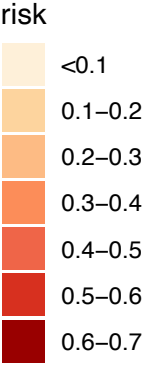

Supplement: code.zip [file code.zip]

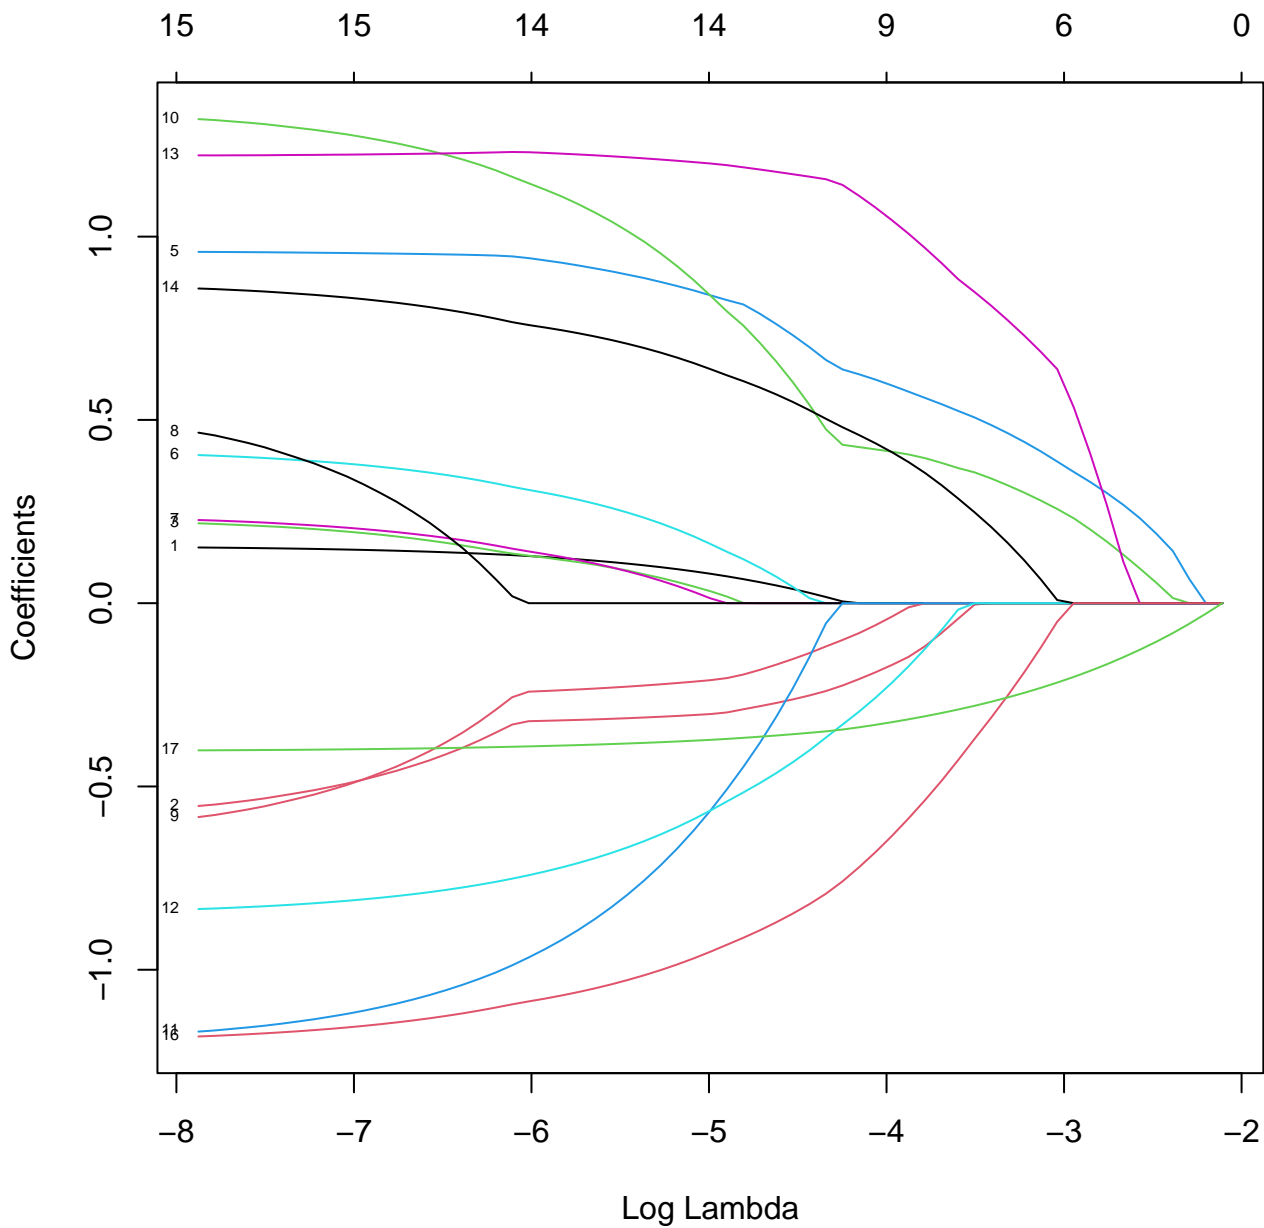

Supplement: code.zip [file code.zip]

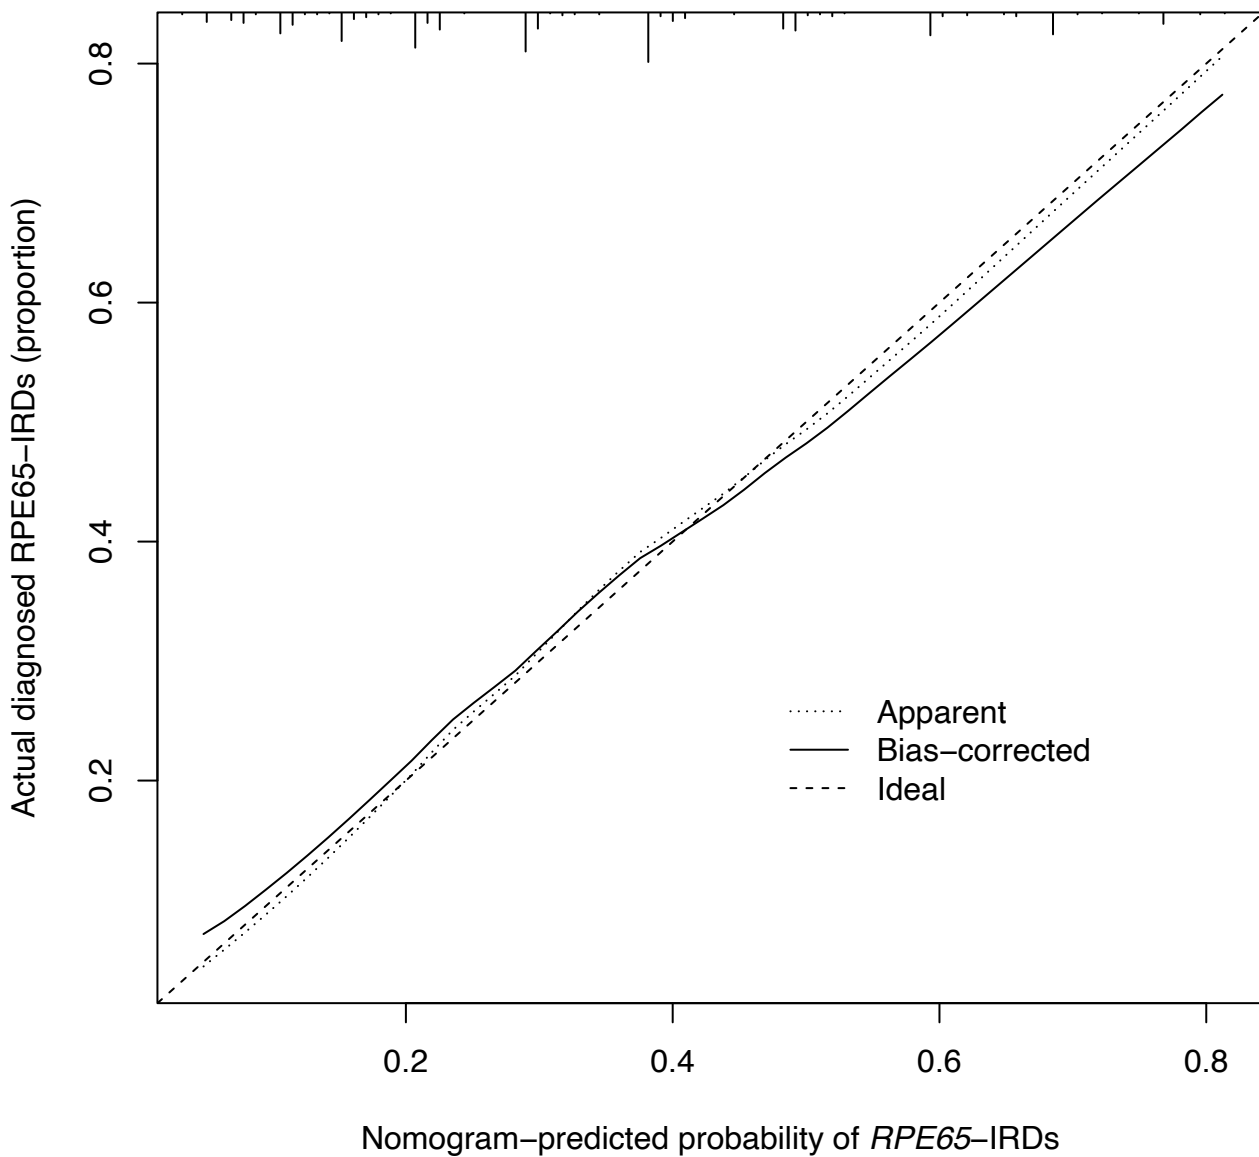

Supplement: code.zip [file code.zip]
